# Supplementary material for: Eukaryotic initiation factor 4 A-3 promotes glioblastoma growth and invasion through the Notch1-dependent pathway
Source: Springer Nature journal article supplement (doi:10.1186/s12885-023-10946-8), 2023-06-15

Original data of Figure 2b:

|             | U87+NC |       |       | U87+EIF4A3-KD |       |       |
|-------------|--------|-------|-------|---------------|-------|-------|
| <b>Day1</b> | 0.212  | 0.222 | 0.215 | 0.205         | 0.209 | 0.207 |
| <b>Day2</b> | 0.384  | 0.387 | 0.398 | 0.347         | 0.344 | 0.339 |
| <b>Day3</b> | 0.523  | 0.594 | 0.592 | 0.456         | 0.428 | 0.421 |
| <b>Day4</b> | 0.910  | 0.915 | 0.959 | 0.723         | 0.706 | 0.759 |
| <b>Day5</b> | 1.543  | 1.499 | 1.404 | 1.270         | 1.246 | 1.286 |

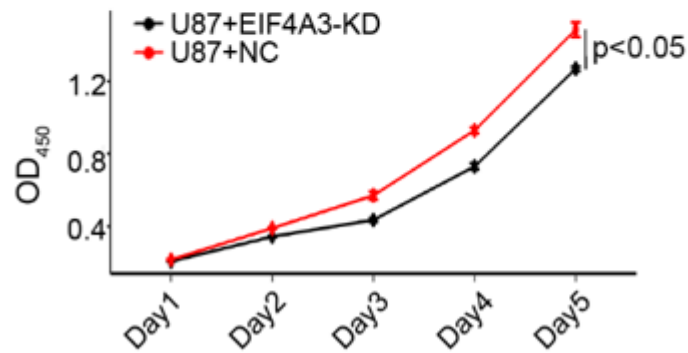

|             | T98G+NC |       |       | T98G+EIF4A3-KD |       |       |
|-------------|---------|-------|-------|----------------|-------|-------|
| <b>Day1</b> | 0.359   | 0.373 | 0.368 | 0.379          | 0.398 | 0.387 |
| <b>Day2</b> | 0.719   | 0.716 | 0.772 | 0.671          | 0.612 | 0.652 |
| <b>Day3</b> | 1.461   | 1.447 | 1.480 | 1.213          | 1.243 | 1.257 |
| <b>Day4</b> | 2.089   | 2.019 | 2.095 | 1.824          | 1.860 | 1.790 |
| <b>Day5</b> | 2.875   | 2.880 | 2.875 | 2.572          | 2.555 | 2.580 |

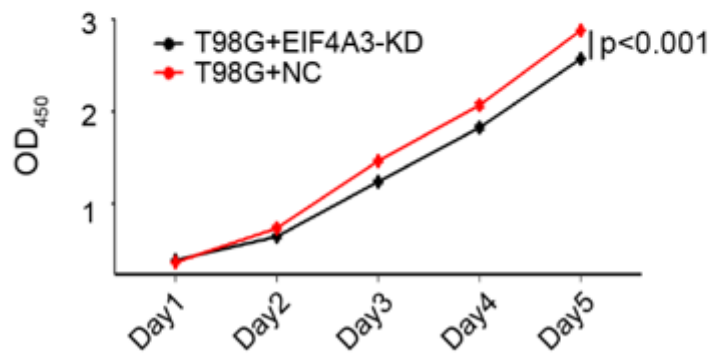

Original data of Figure 5a:

|             | U251-MG-EIF4A3-OE |       |       | U251-MG-EIF4A3-OE+DAPT |       |       |
|-------------|-------------------|-------|-------|------------------------|-------|-------|
| <b>Day1</b> | 0.263             | 0.259 | 0.254 | 0.245                  | 0.244 | 0.250 |
| <b>Day2</b> | 0.473             | 0.478 | 0.476 | 0.366                  | 0.365 | 0.389 |
| <b>Day3</b> | 0.646             | 0.666 | 0.698 | 0.598                  | 0.563 | 0.513 |
| <b>Day4</b> | 0.839             | 0.846 | 0.889 | 0.700                  | 0.743 | 0.757 |
| <b>Day5</b> | 1.489             | 1.333 | 1.370 | 1.095                  | 1.083 | 1.078 |

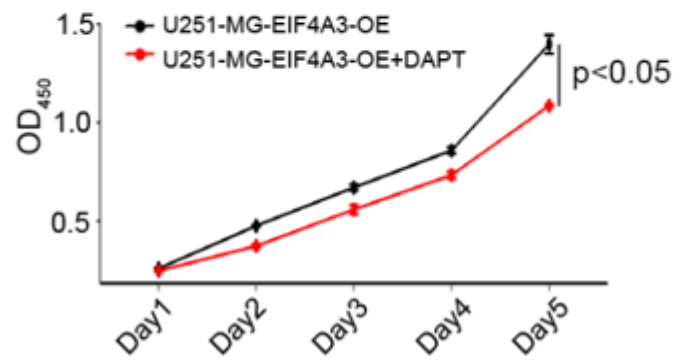

|             | A172-EIF4A3-OE |       |       | A172-EIF4A3-OE+DAPT |       |       |
|-------------|----------------|-------|-------|---------------------|-------|-------|
| <b>Day1</b> | 0.297          | 0.310 | 0.310 | 0.314               | 0.315 | 0.312 |
| <b>Day2</b> | 0.738          | 0.739 | 0.760 | 0.665               | 0.687 | 0.636 |
| <b>Day3</b> | 1.169          | 1.102 | 1.123 | 0.983               | 0.924 | 0.992 |
| <b>Day4</b> | 1.738          | 1.834 | 1.684 | 1.554               | 1.539 | 1.581 |
| <b>Day5</b> | 2.513          | 2.485 | 2.638 | 2.180               | 2.190 | 2.185 |

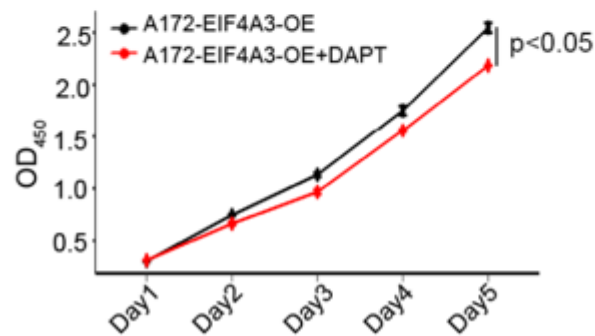

Original data of Figure S1b:

|             | U251-MG+NC |       |       | U251-MG+EIF4A3-OE |       |       |
|-------------|------------|-------|-------|-------------------|-------|-------|
| <b>Day1</b> | 0.290      | 0.282 | 0.295 | 0.294             | 0.273 | 0.281 |
| <b>Day2</b> | 0.307      | 0.302 | 0.312 | 0.325             | 0.349 | 0.336 |
| <b>Day3</b> | 0.353      | 0.364 | 0.363 | 0.414             | 0.437 | 0.421 |
| <b>Day4</b> | 0.473      | 0.453 | 0.434 | 0.575             | 0.548 | 0.535 |
| <b>Day5</b> | 0.522      | 0.527 | 0.527 | 0.811             | 0.811 | 0.774 |

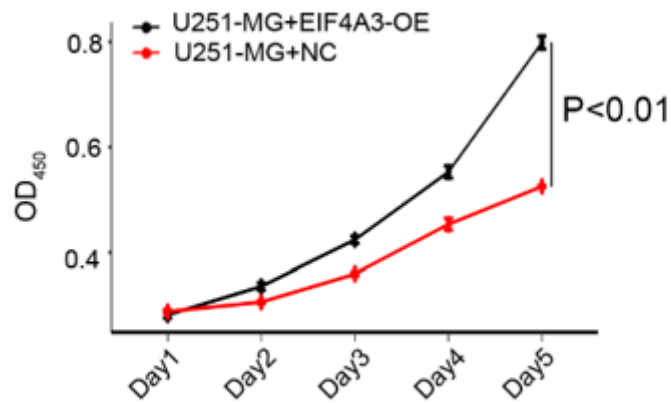

|             | A172+ NC |       |       | A172+EIF4A3-OE |       |       |
|-------------|----------|-------|-------|----------------|-------|-------|
| <b>Day1</b> | 0.237    | 0.238 | 0.243 | 0.257          | 0.250 | 0.254 |
| <b>Day2</b> | 0.333    | 0.305 | 0.329 | 0.383          | 0.383 | 0.384 |
| <b>Day3</b> | 0.489    | 0.498 | 0.504 | 0.596          | 0.627 | 0.622 |
| <b>Day4</b> | 0.797    | 0.803 | 0.814 | 1.019          | 1.102 | 1.004 |
| <b>Day5</b> | 1.531    | 1.508 | 1.632 | 1.810          | 1.858 | 1.825 |

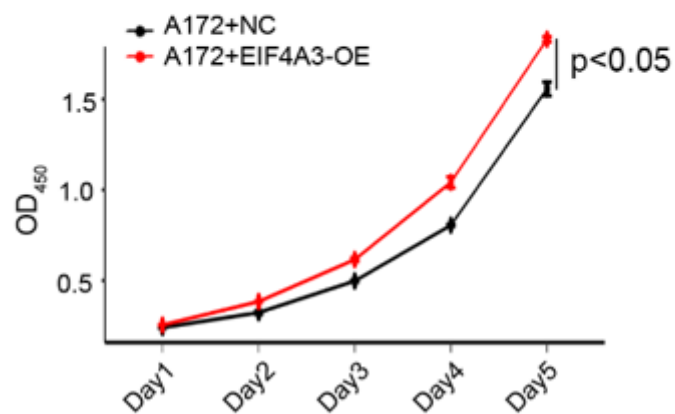

Figure 2a-U87, IB: EIF4A3:

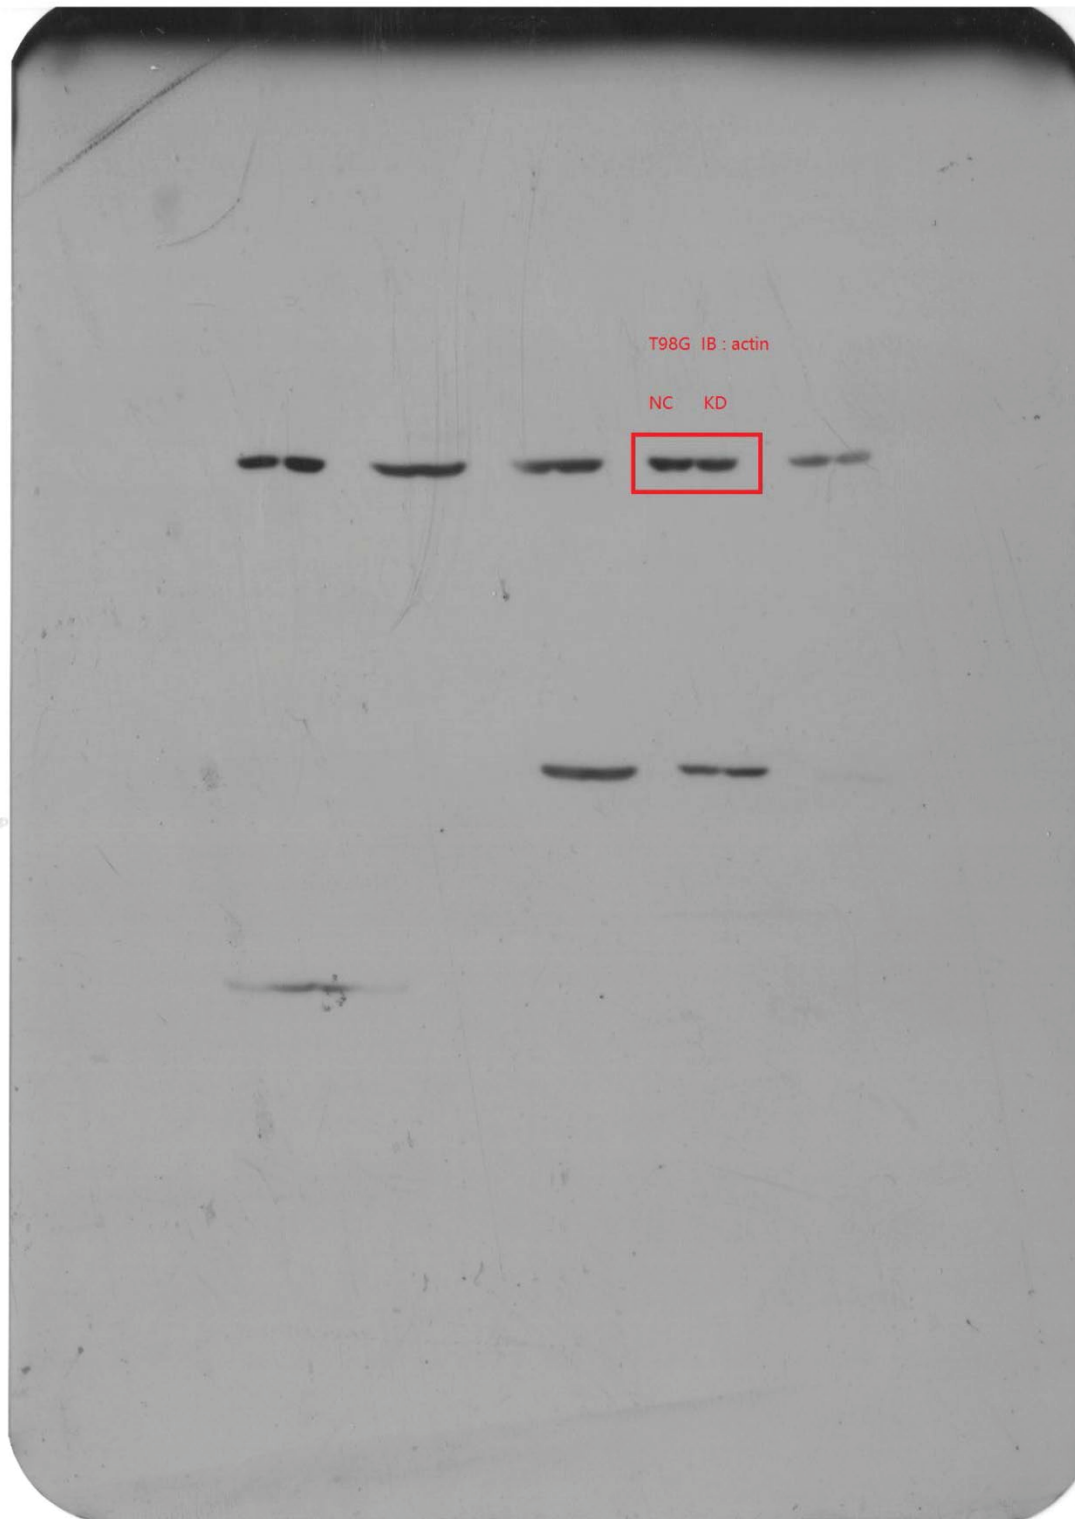

Figure 2a-T98g, IB: EIF4A3:

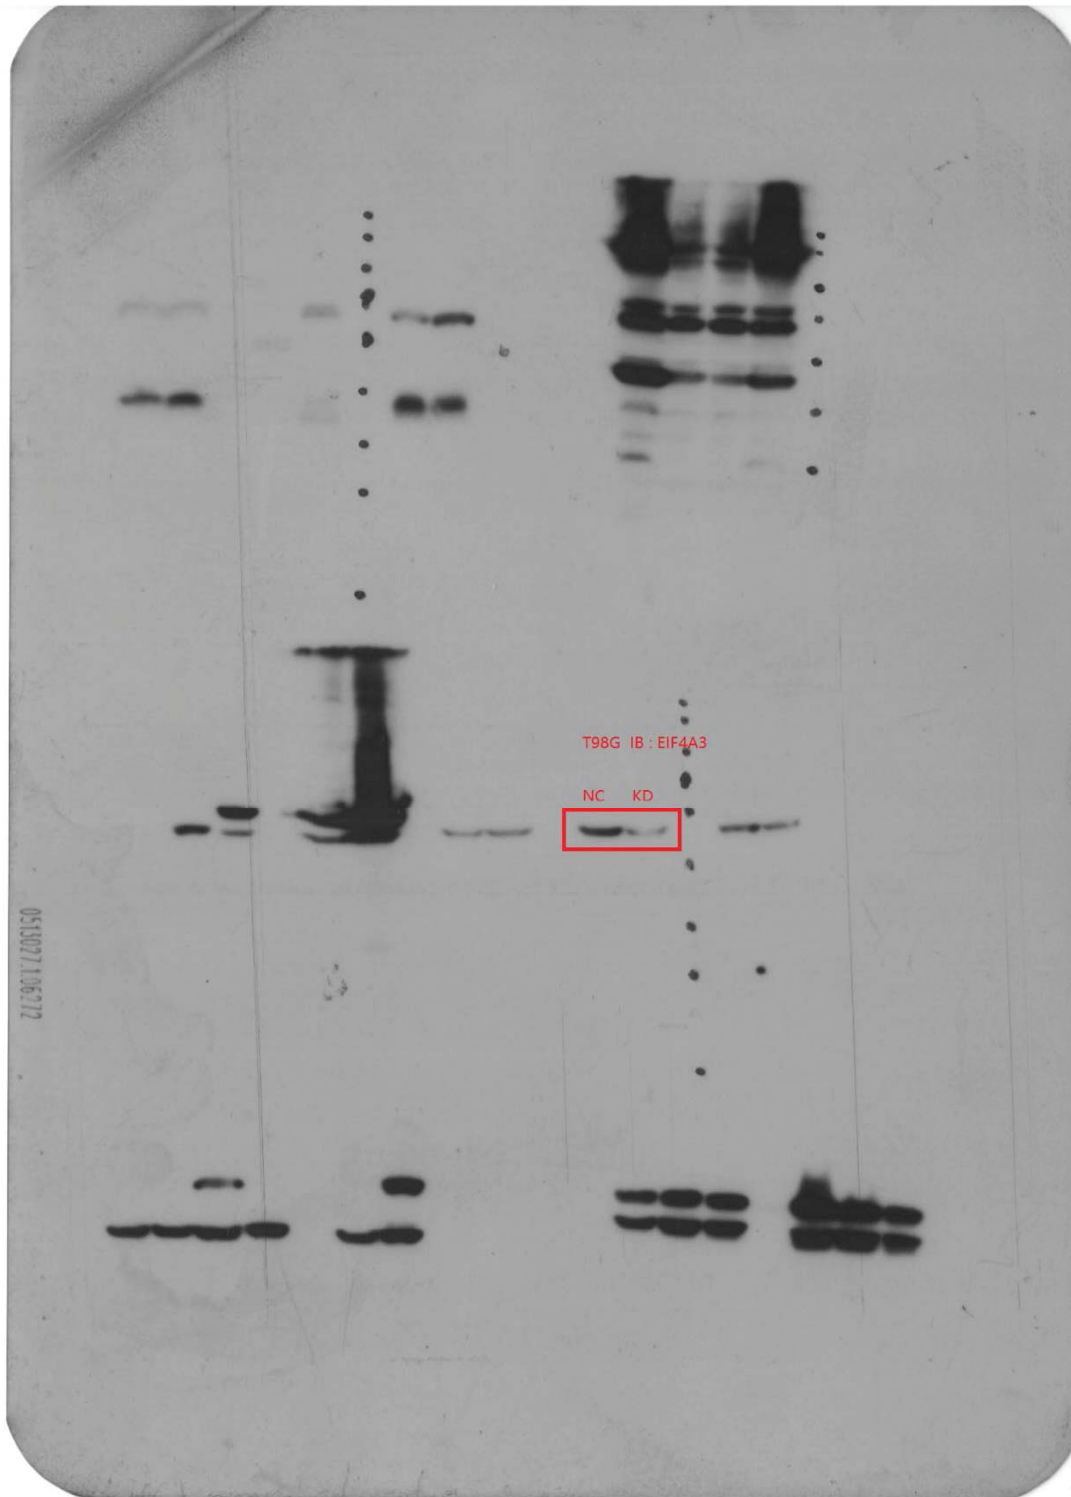

Figure 2a-U87, IB: Actin

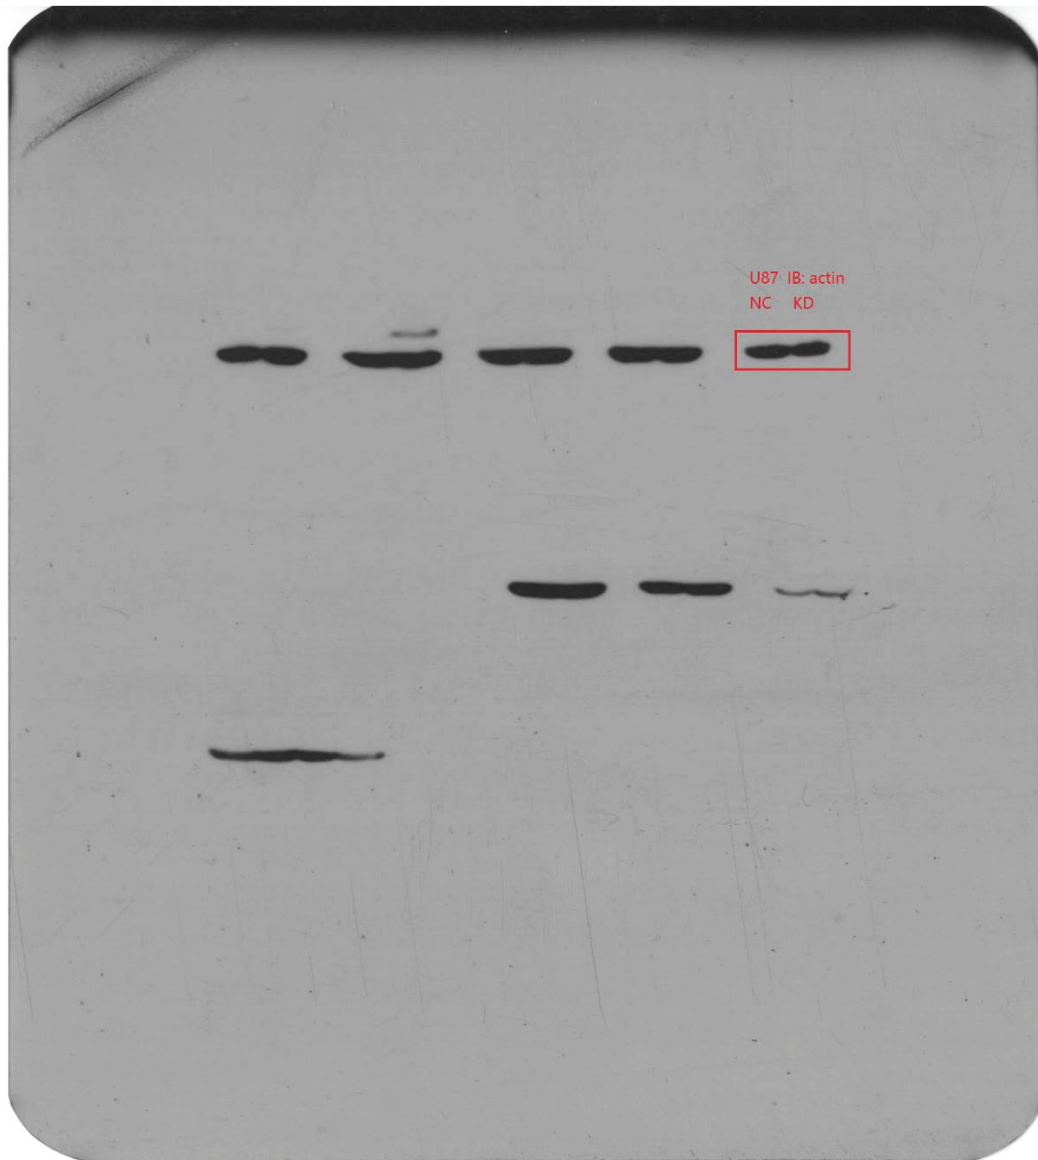

Figure 2a-T98g, IB: Actin

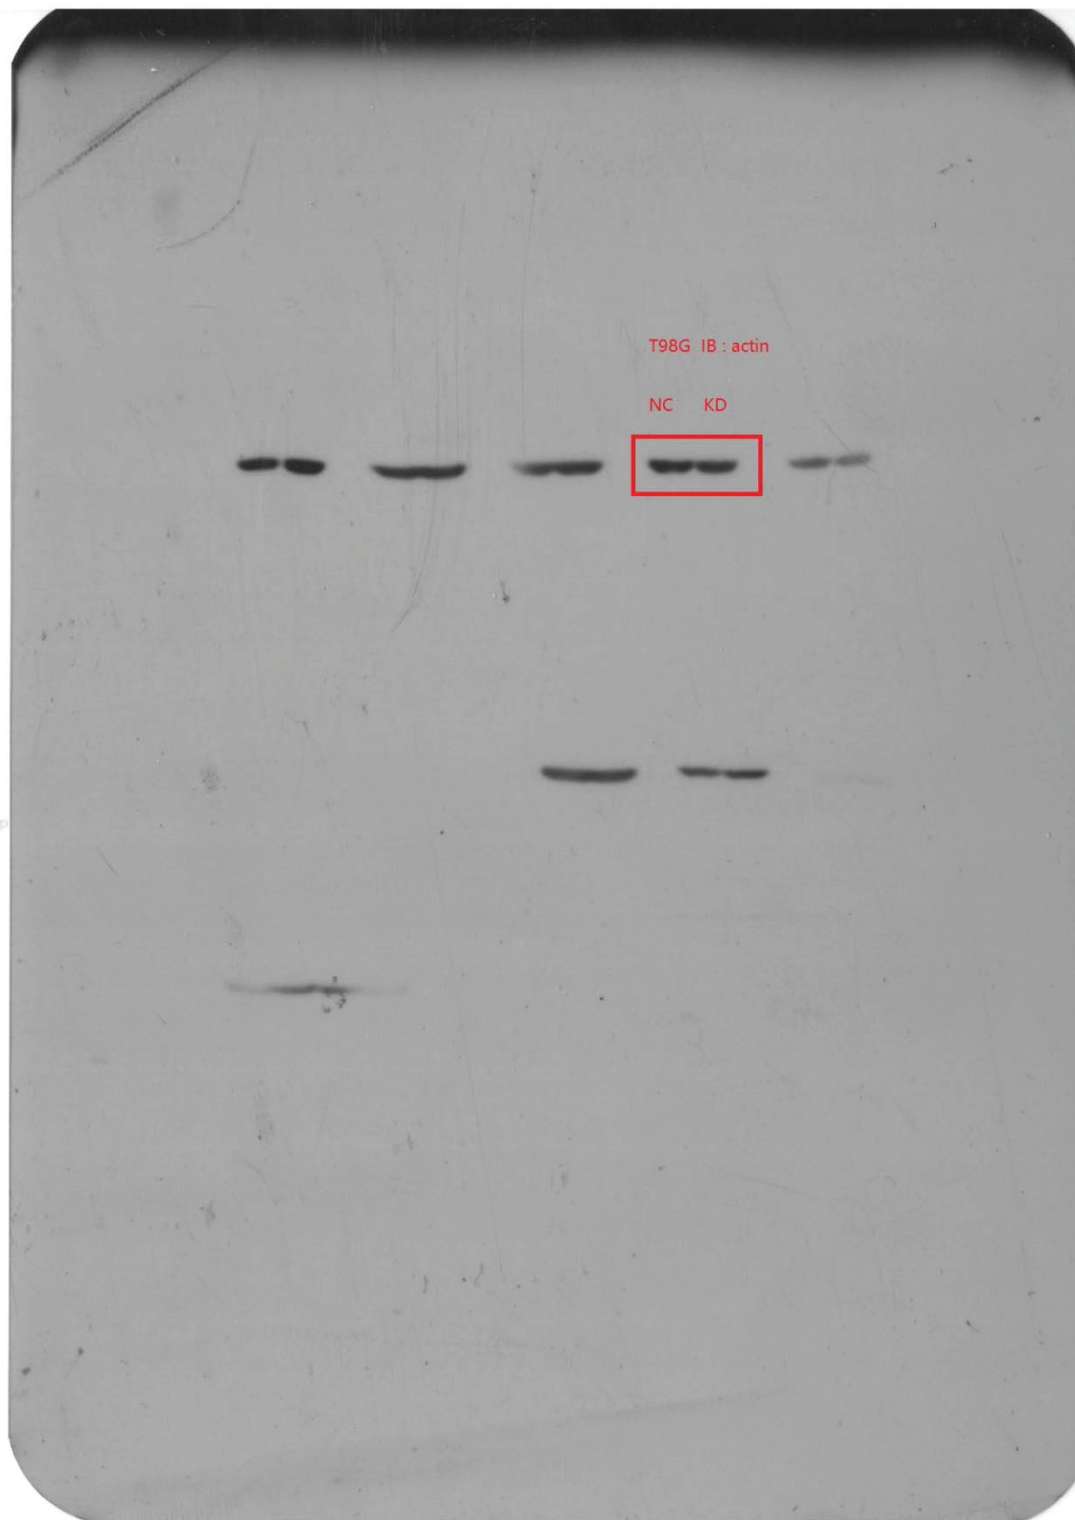

Figure 4a-A172-p-STAT3

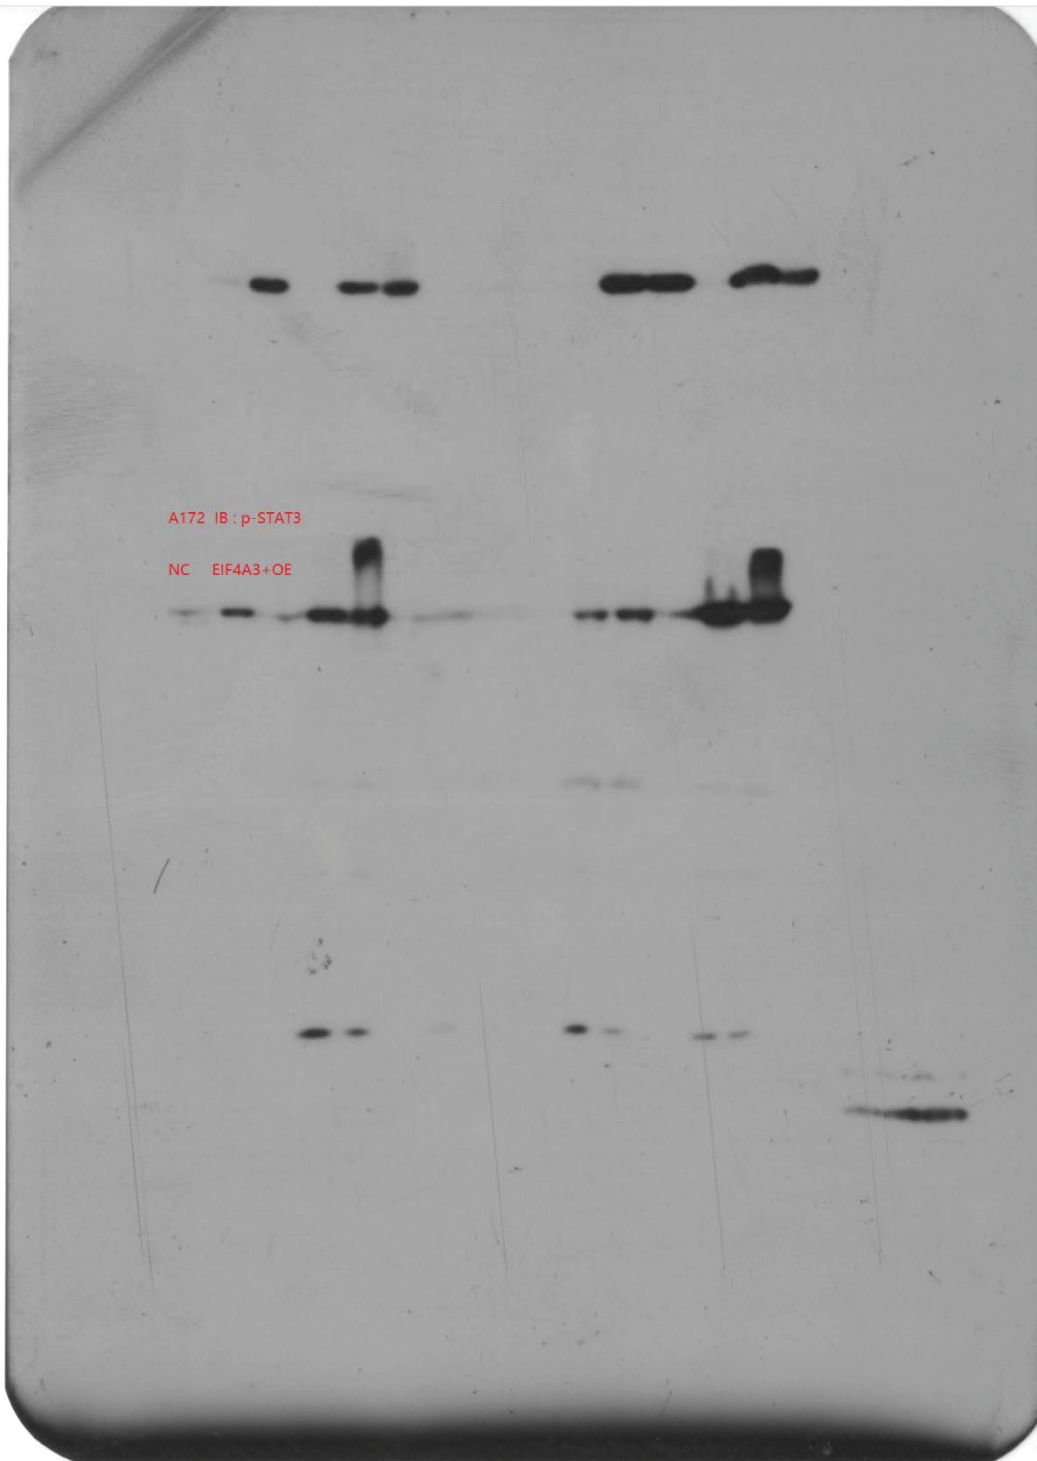



Figure 4a-U251-p-STAT3

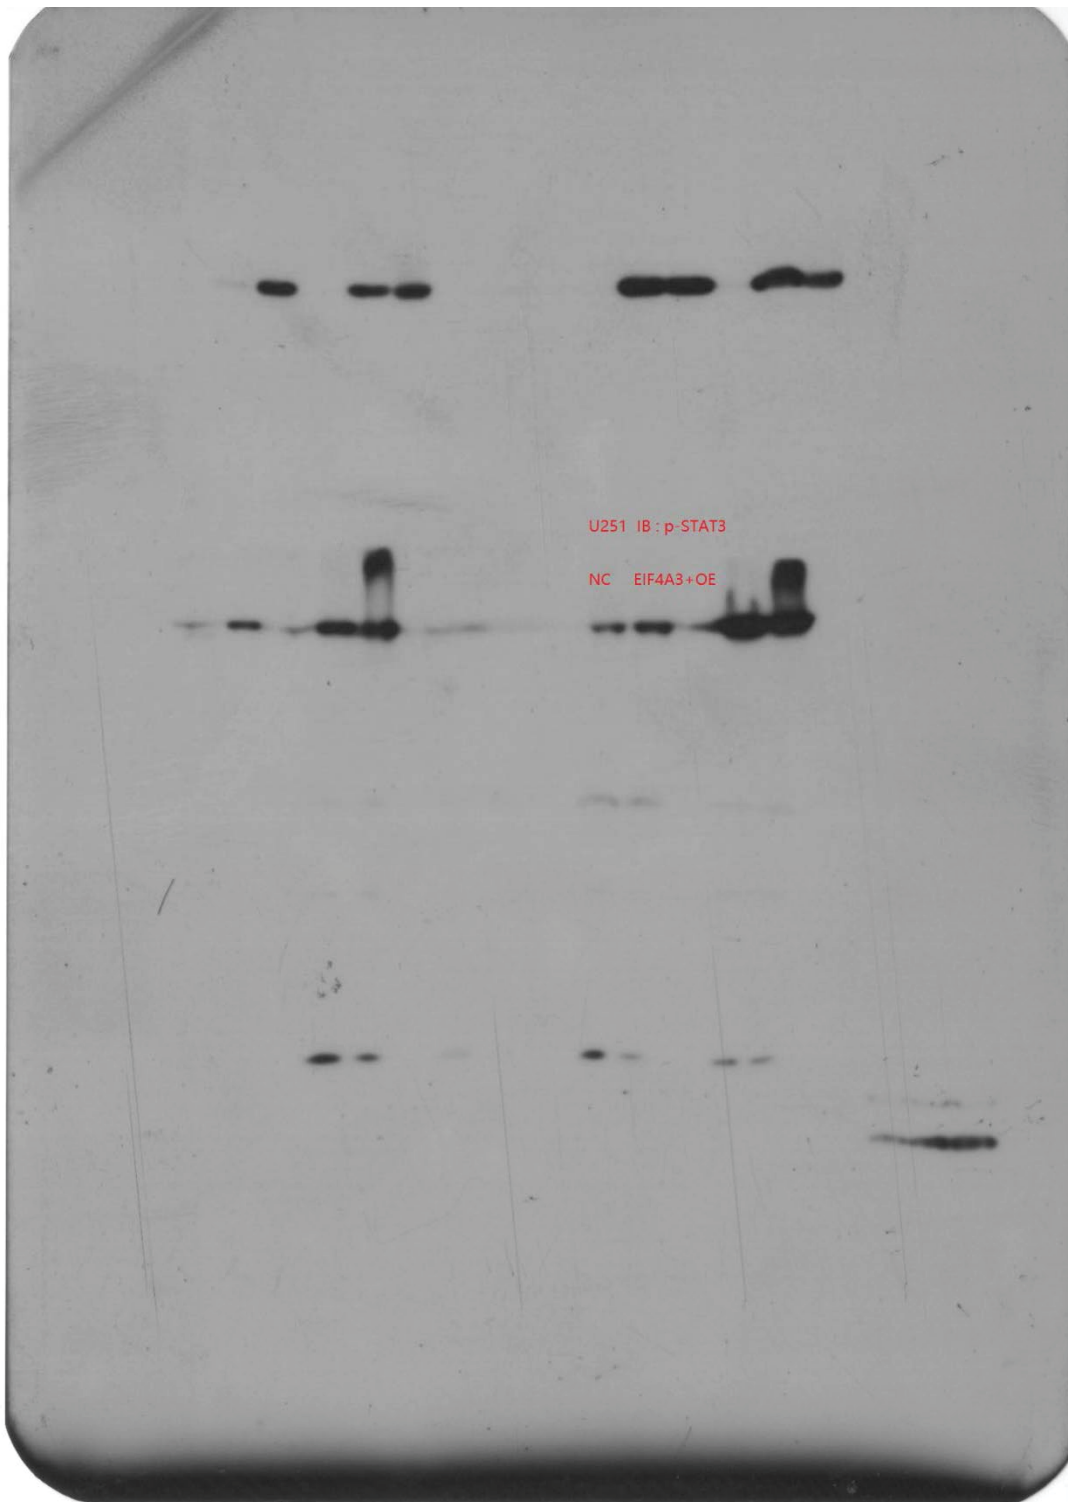

Figure 4a-U87-p-STAT3

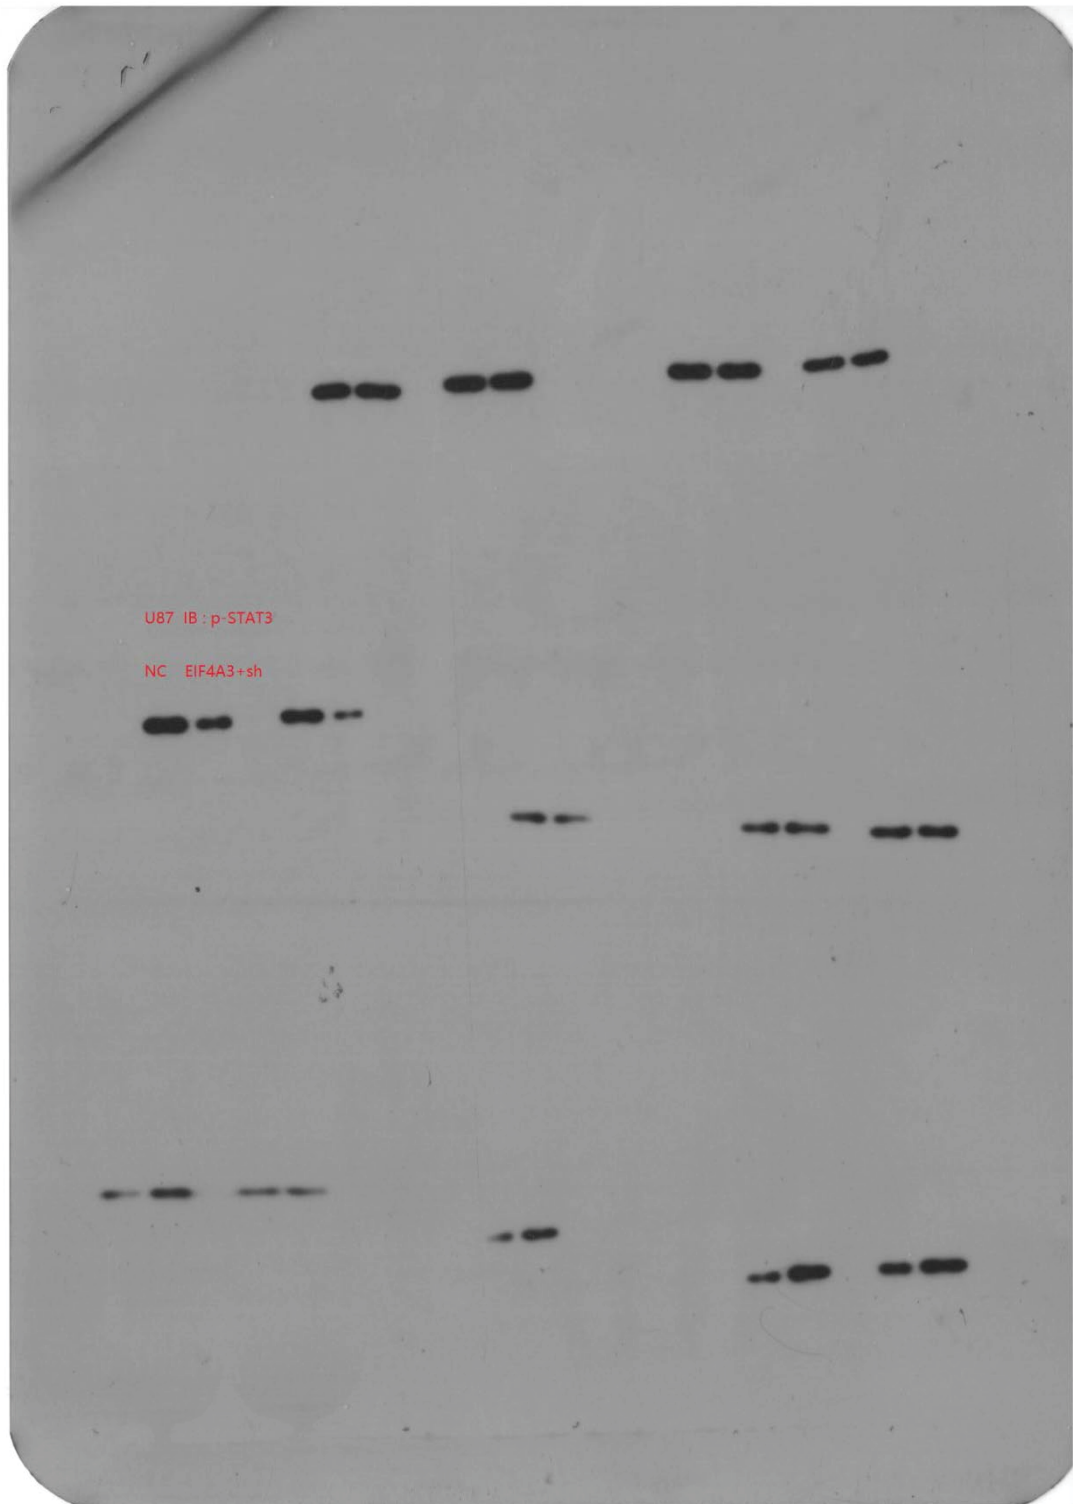

Figure 4a-T98G-p-STAT3

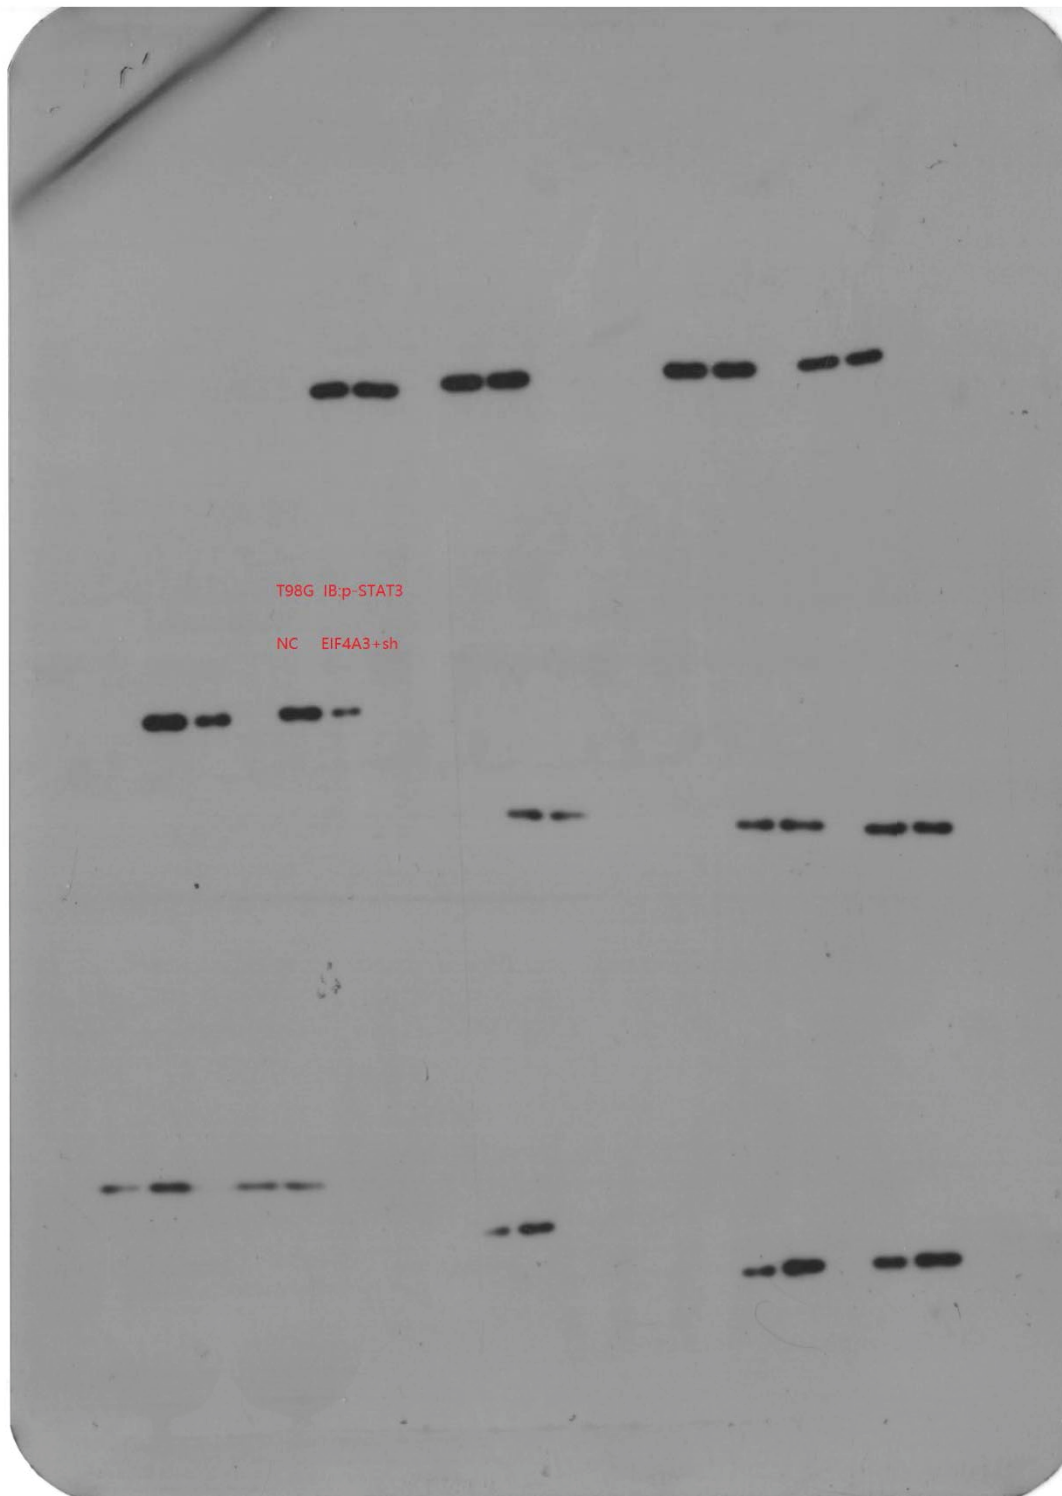

Figure 4a-A172-STAT3

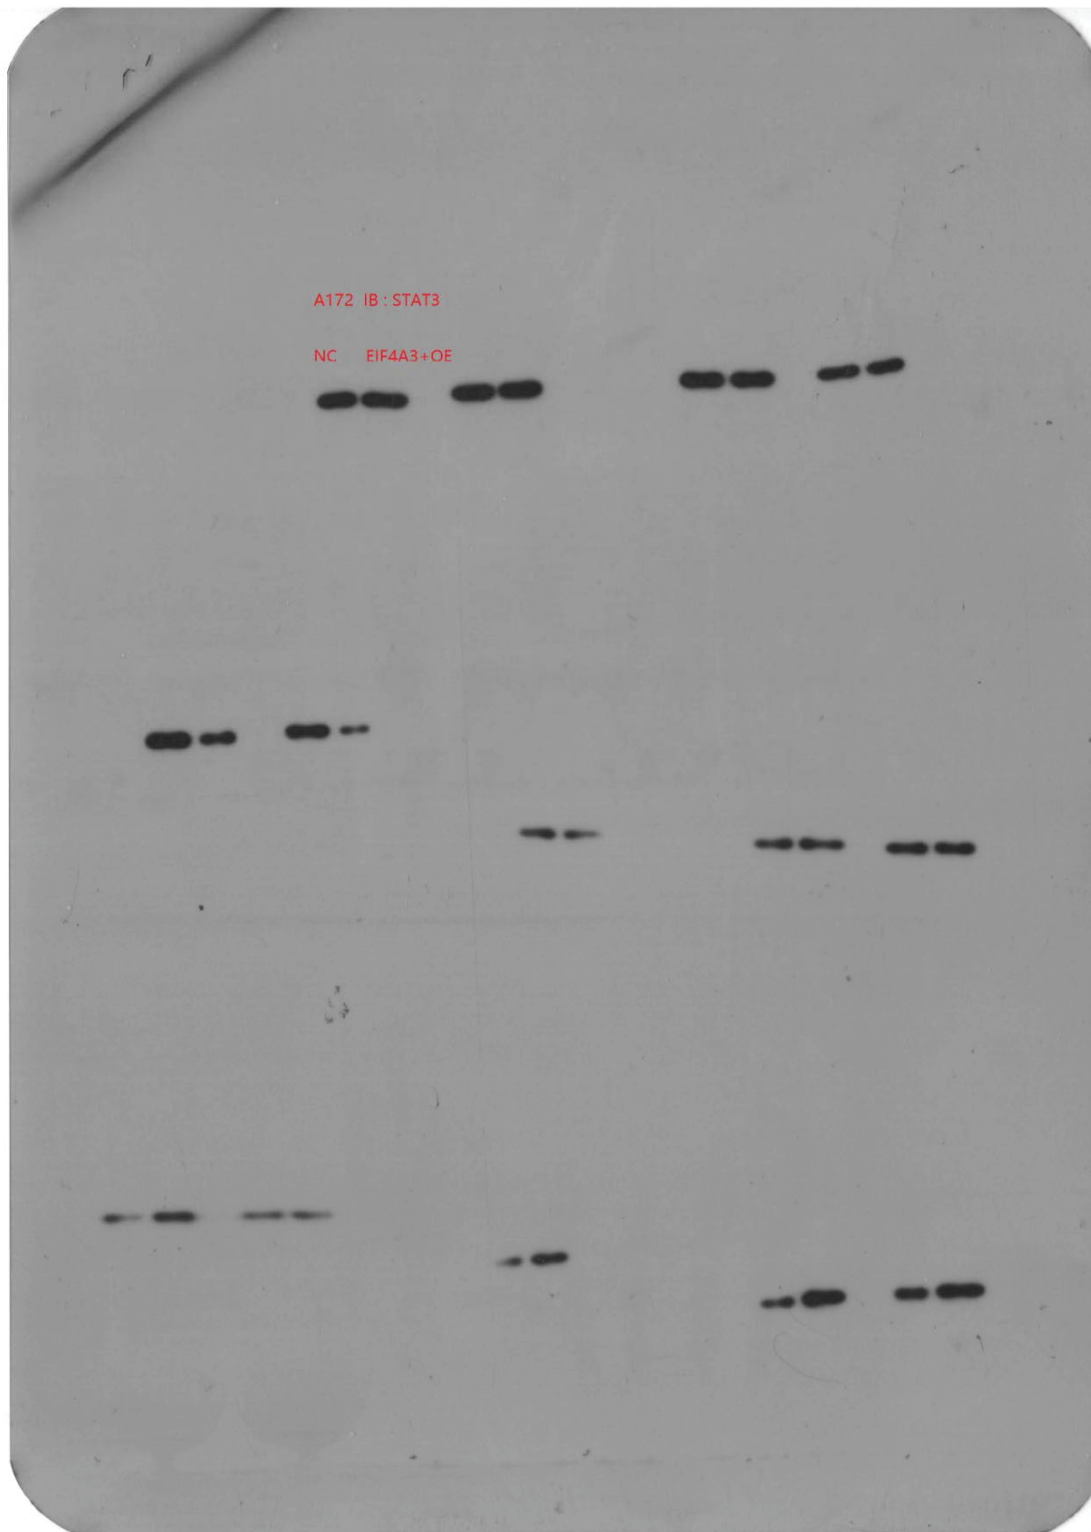

Figure 4a-U251-STAT3

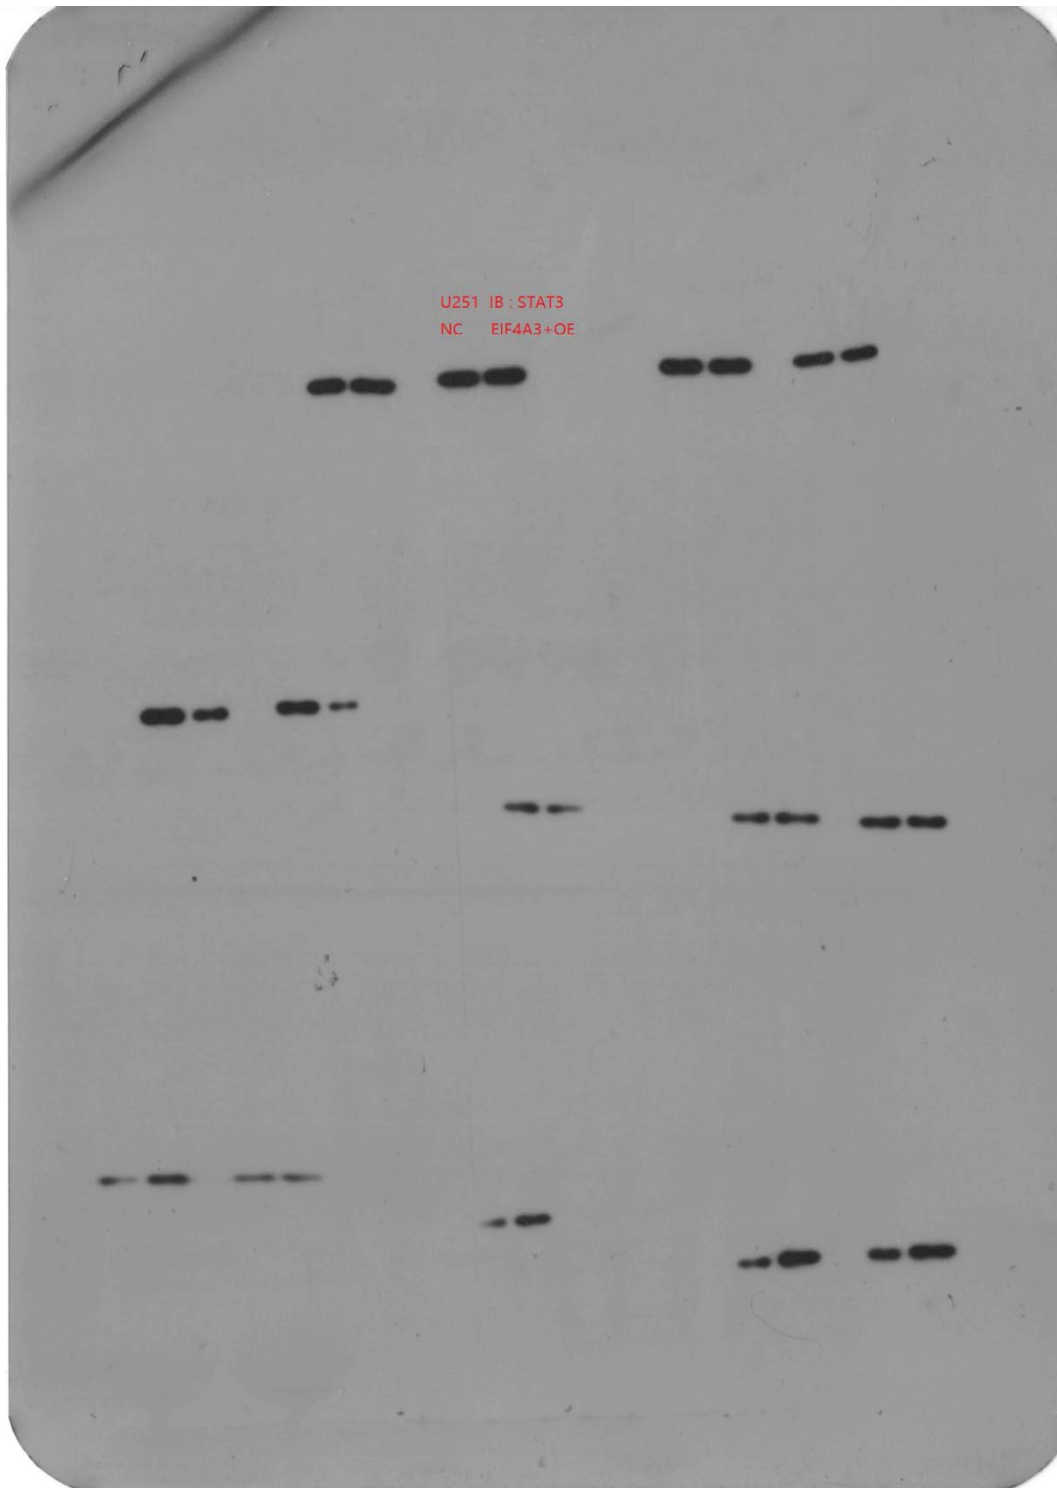

Figure 4a-U87-STAT3

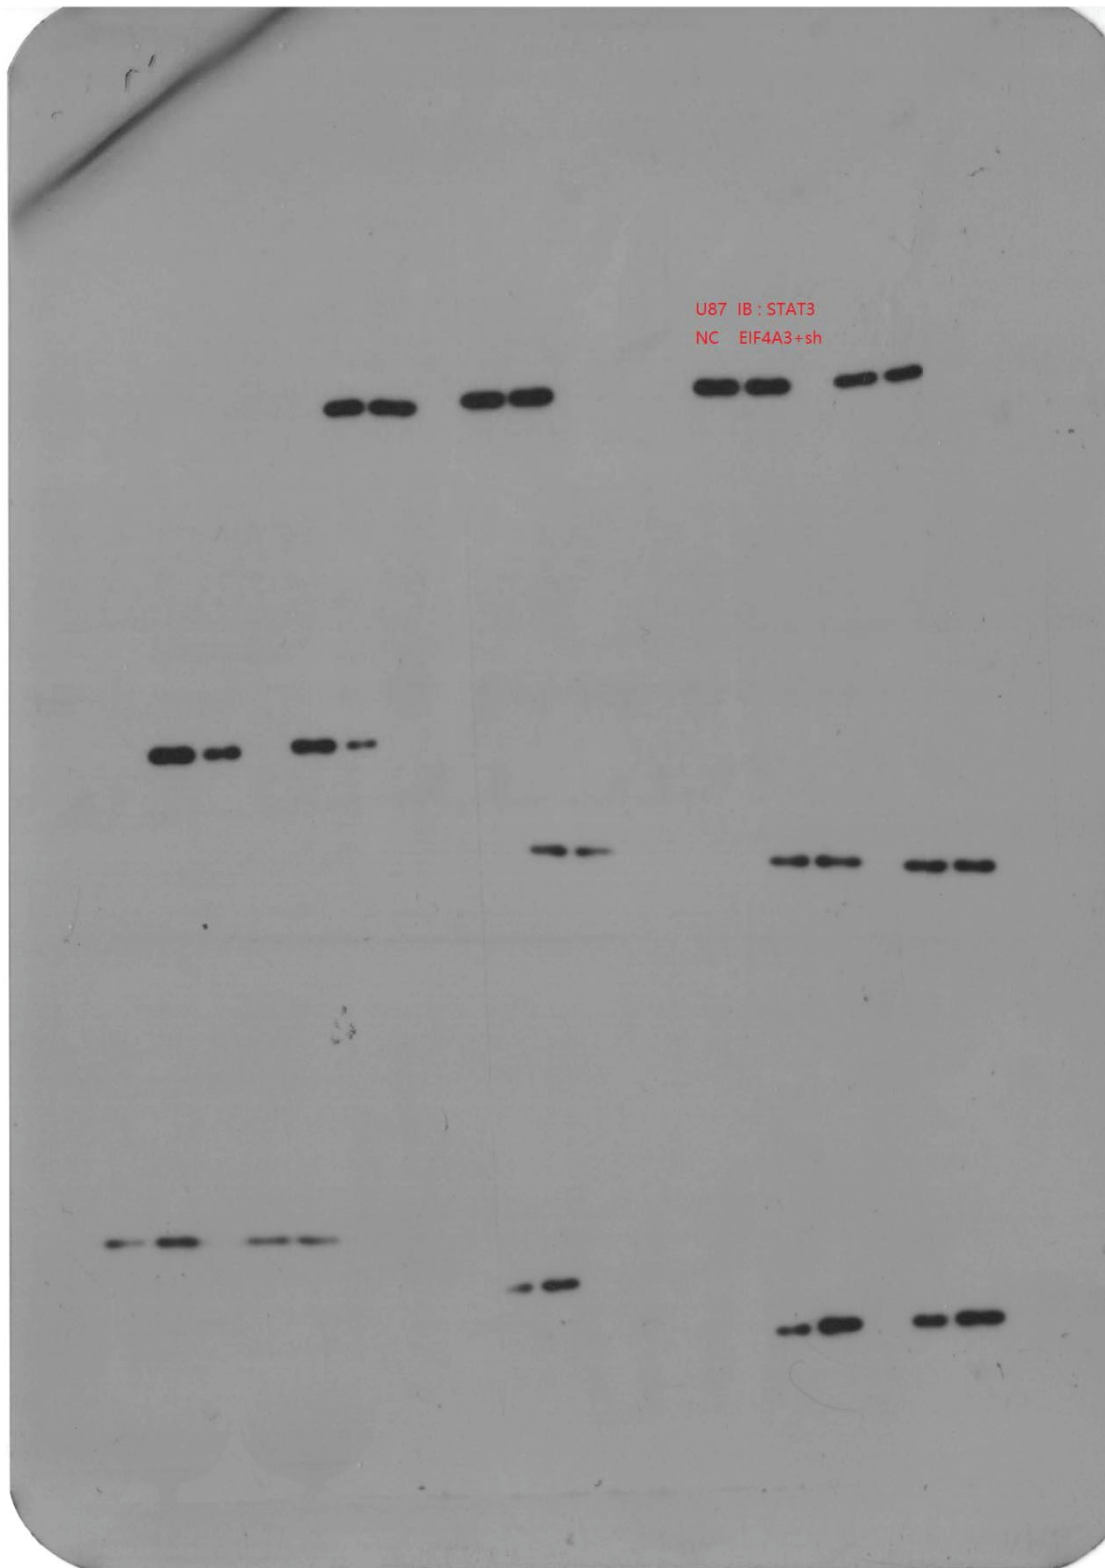

Figure 4a-T98G-STAT3

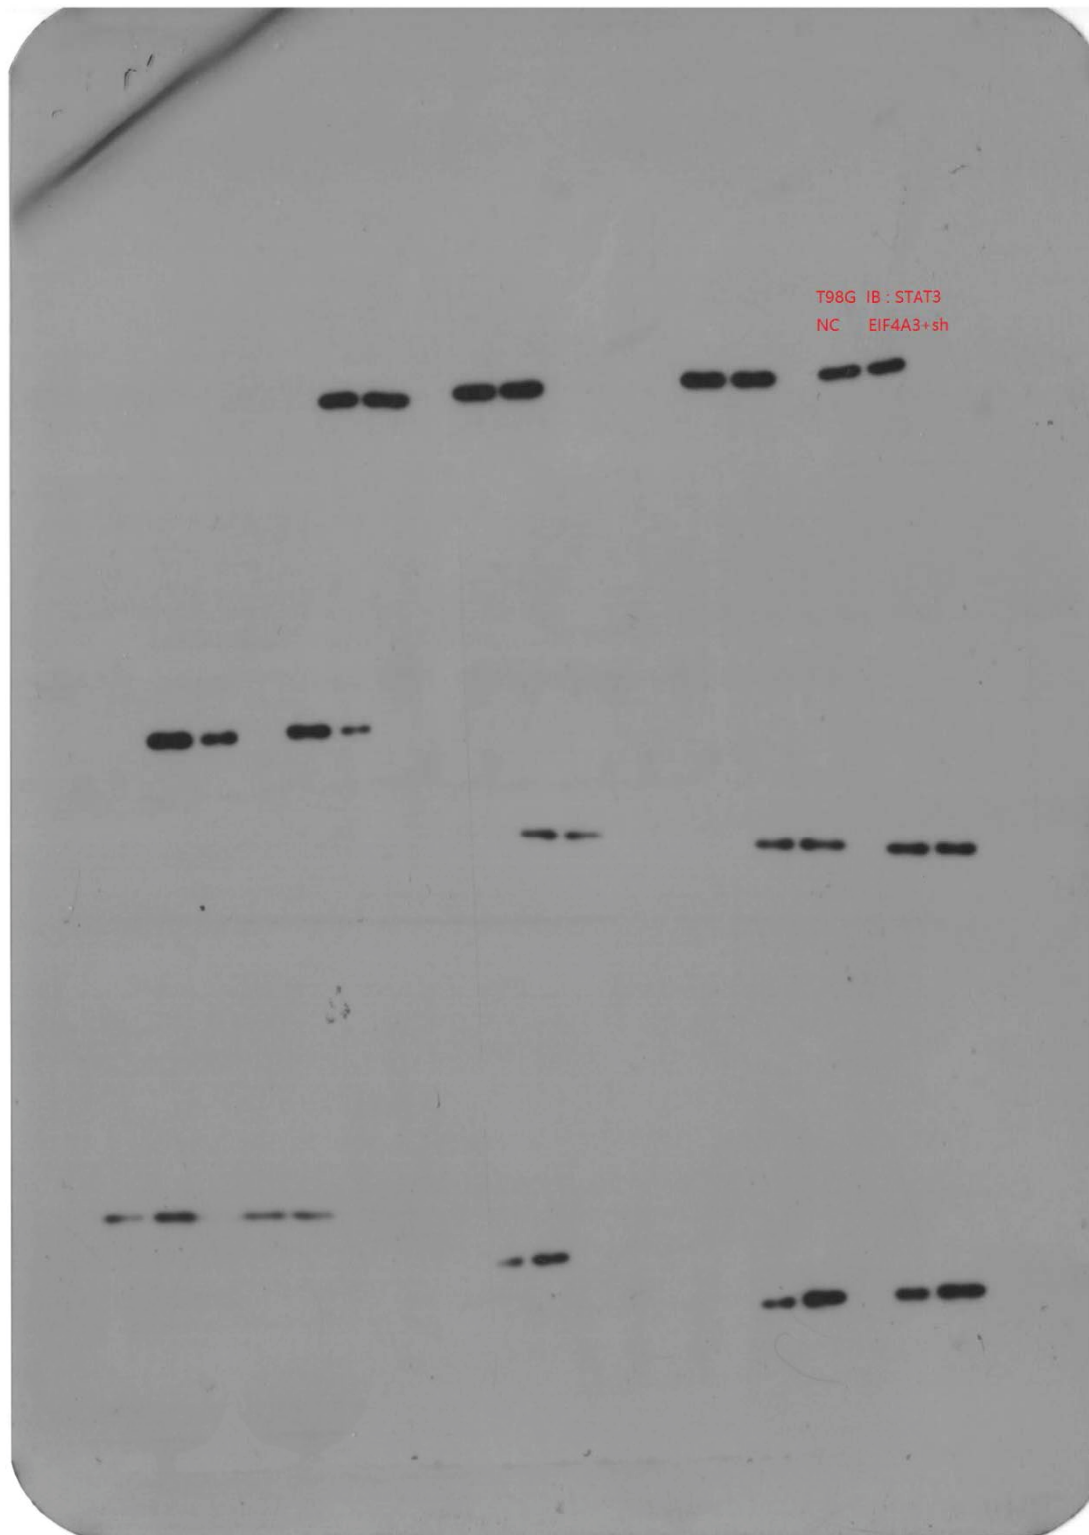

Figure 4a-A172-p-H3

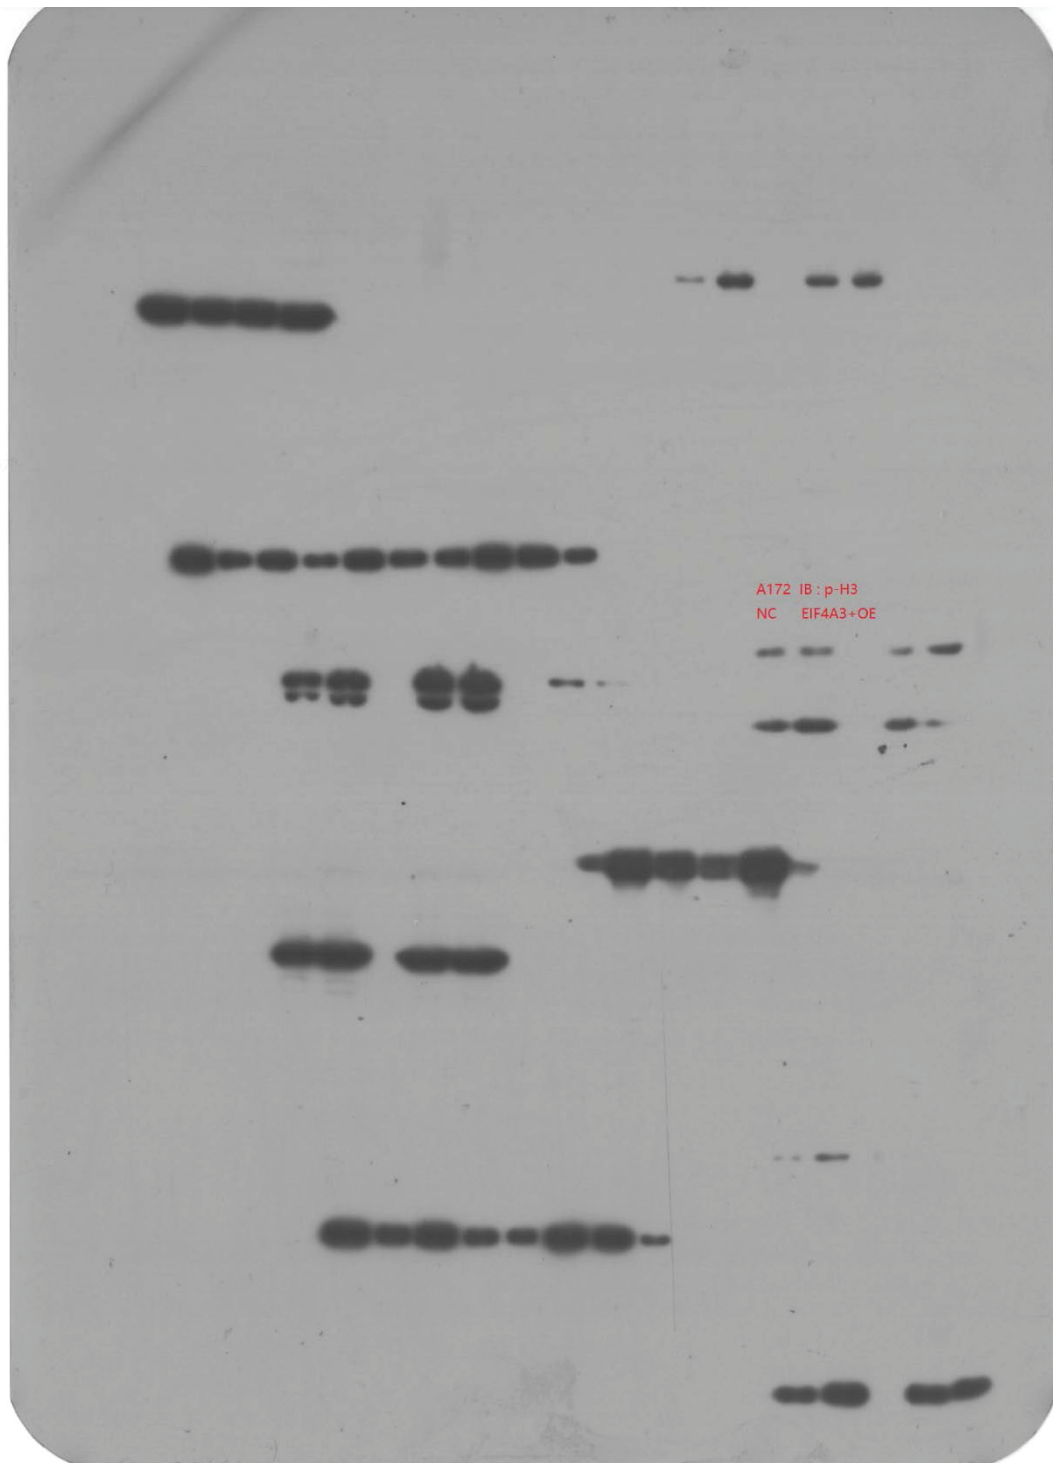



Figure 4a-U251-p-H3

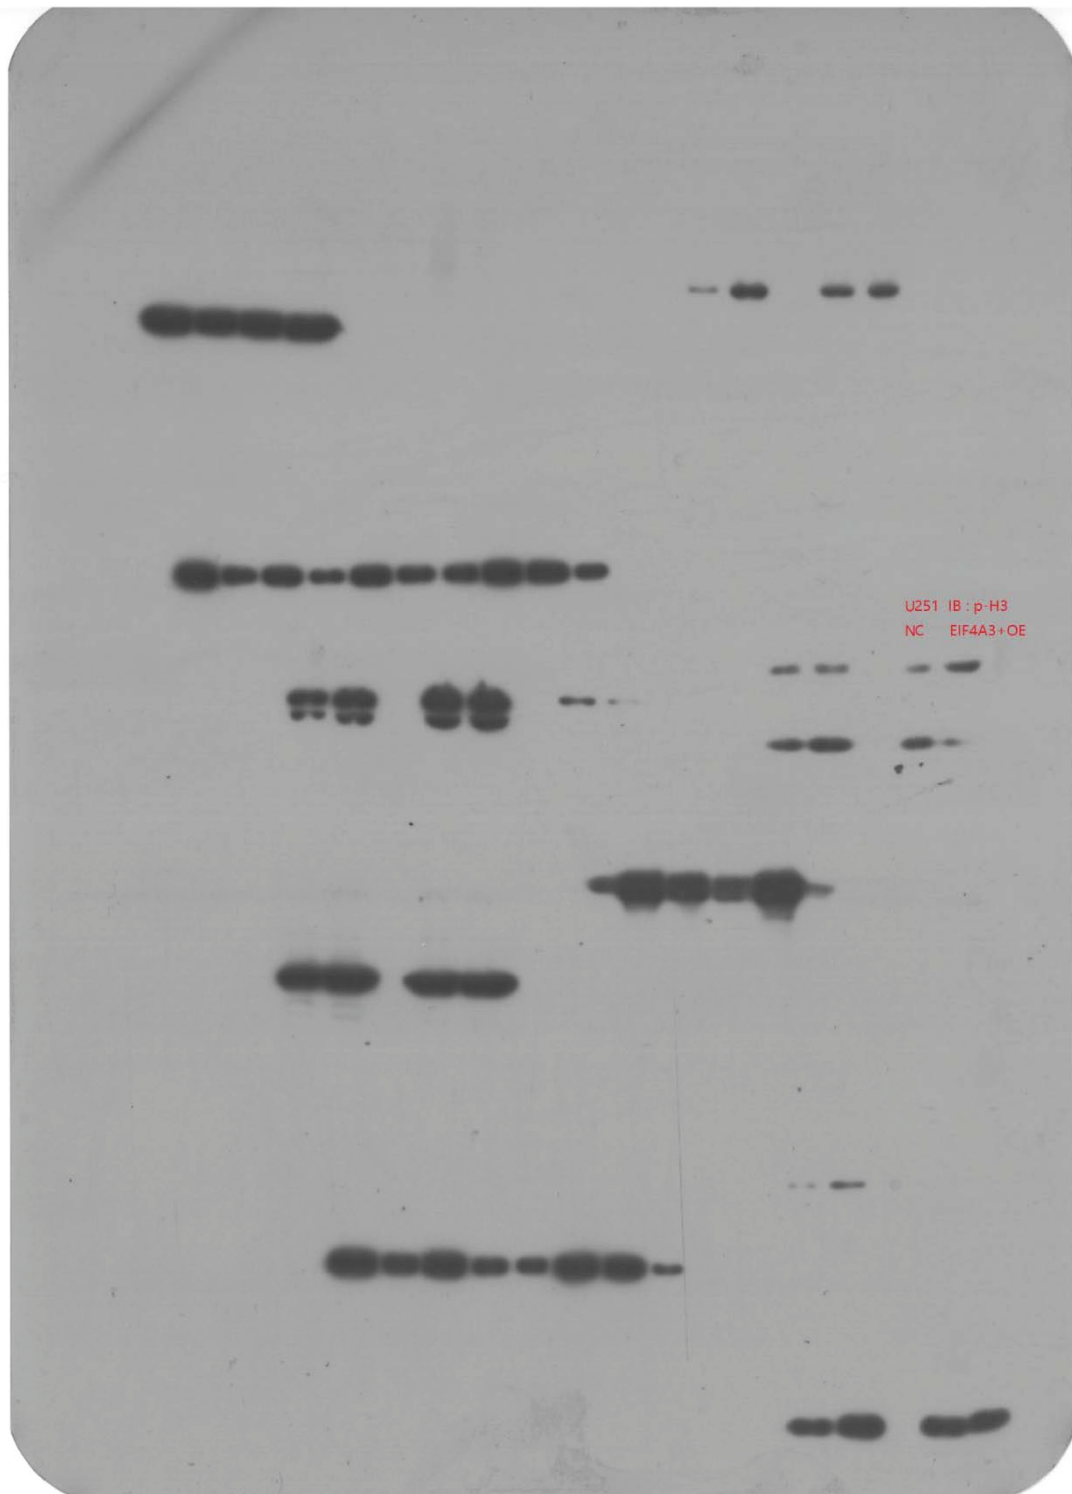

Figure 4a-U87-p-H3

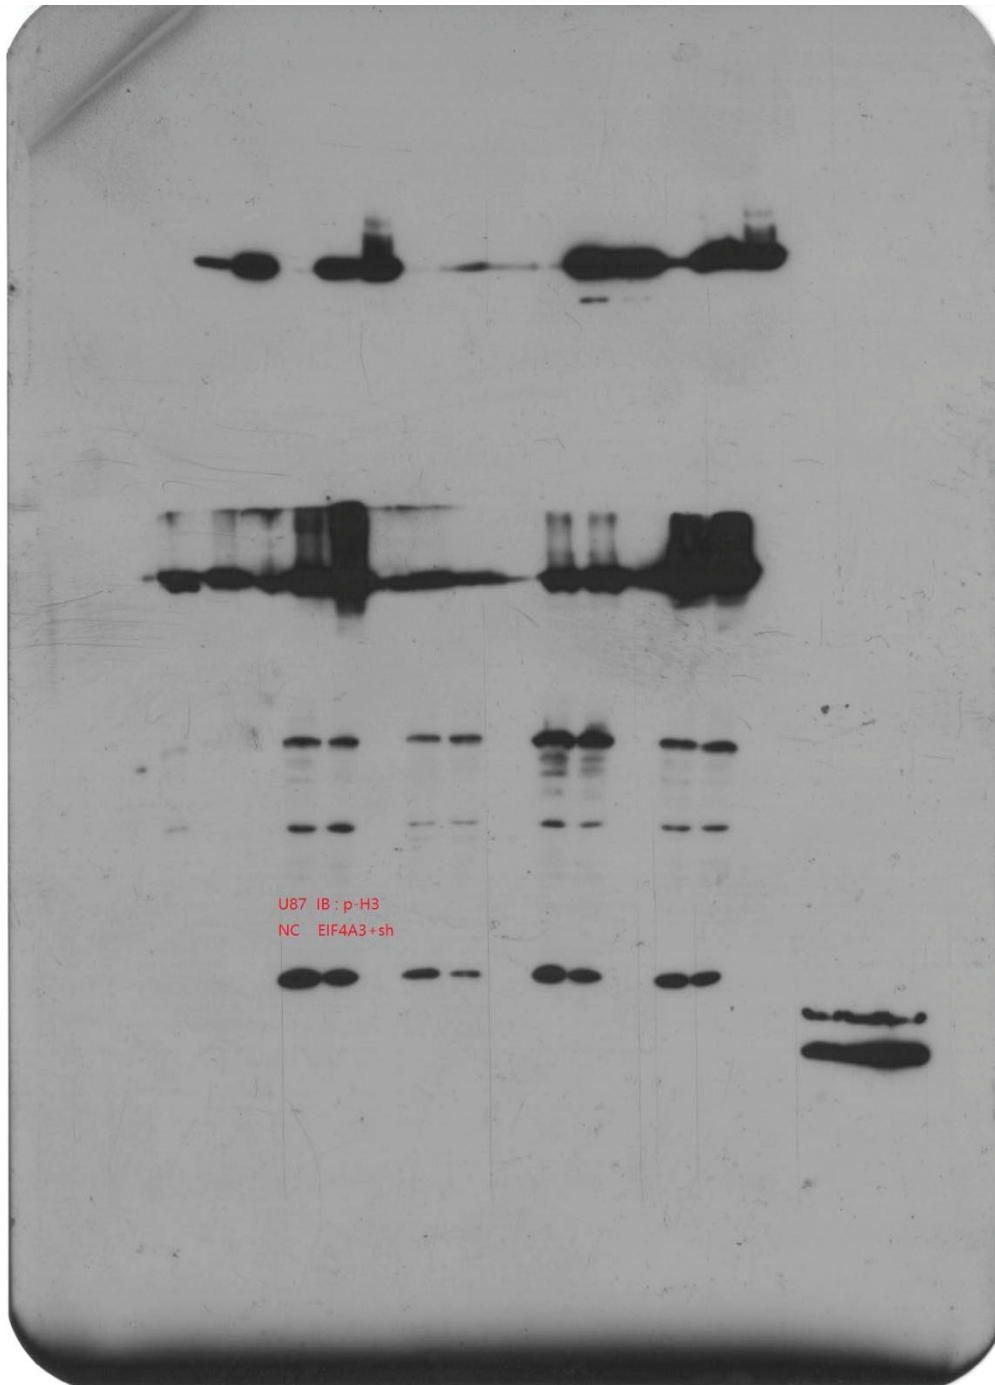

Figure 4a-T98G-p-H3

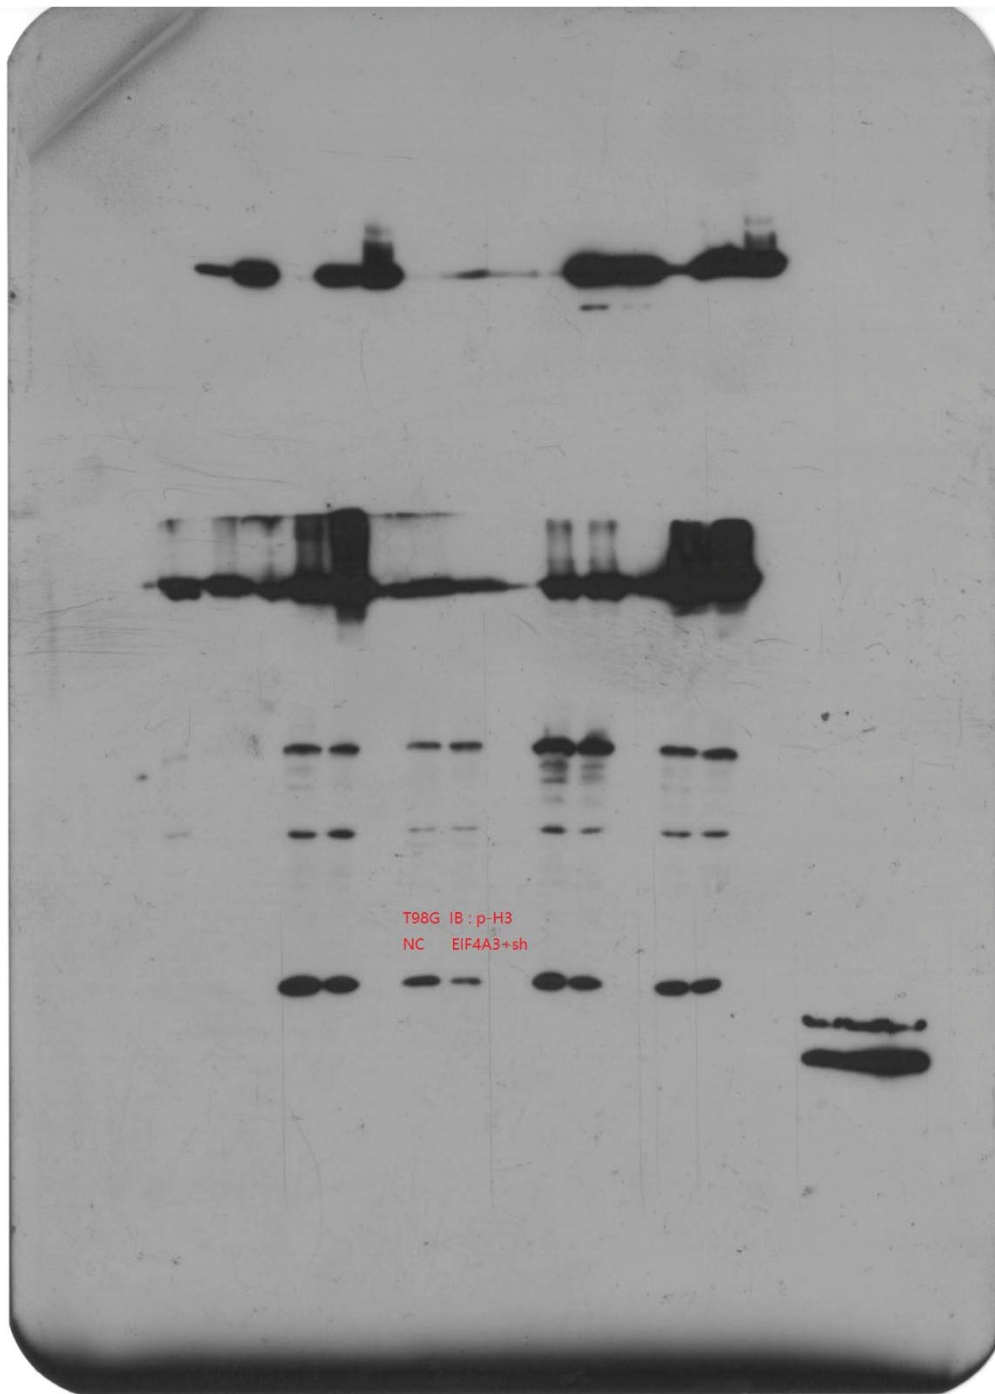

Figure 4a-A172-H3

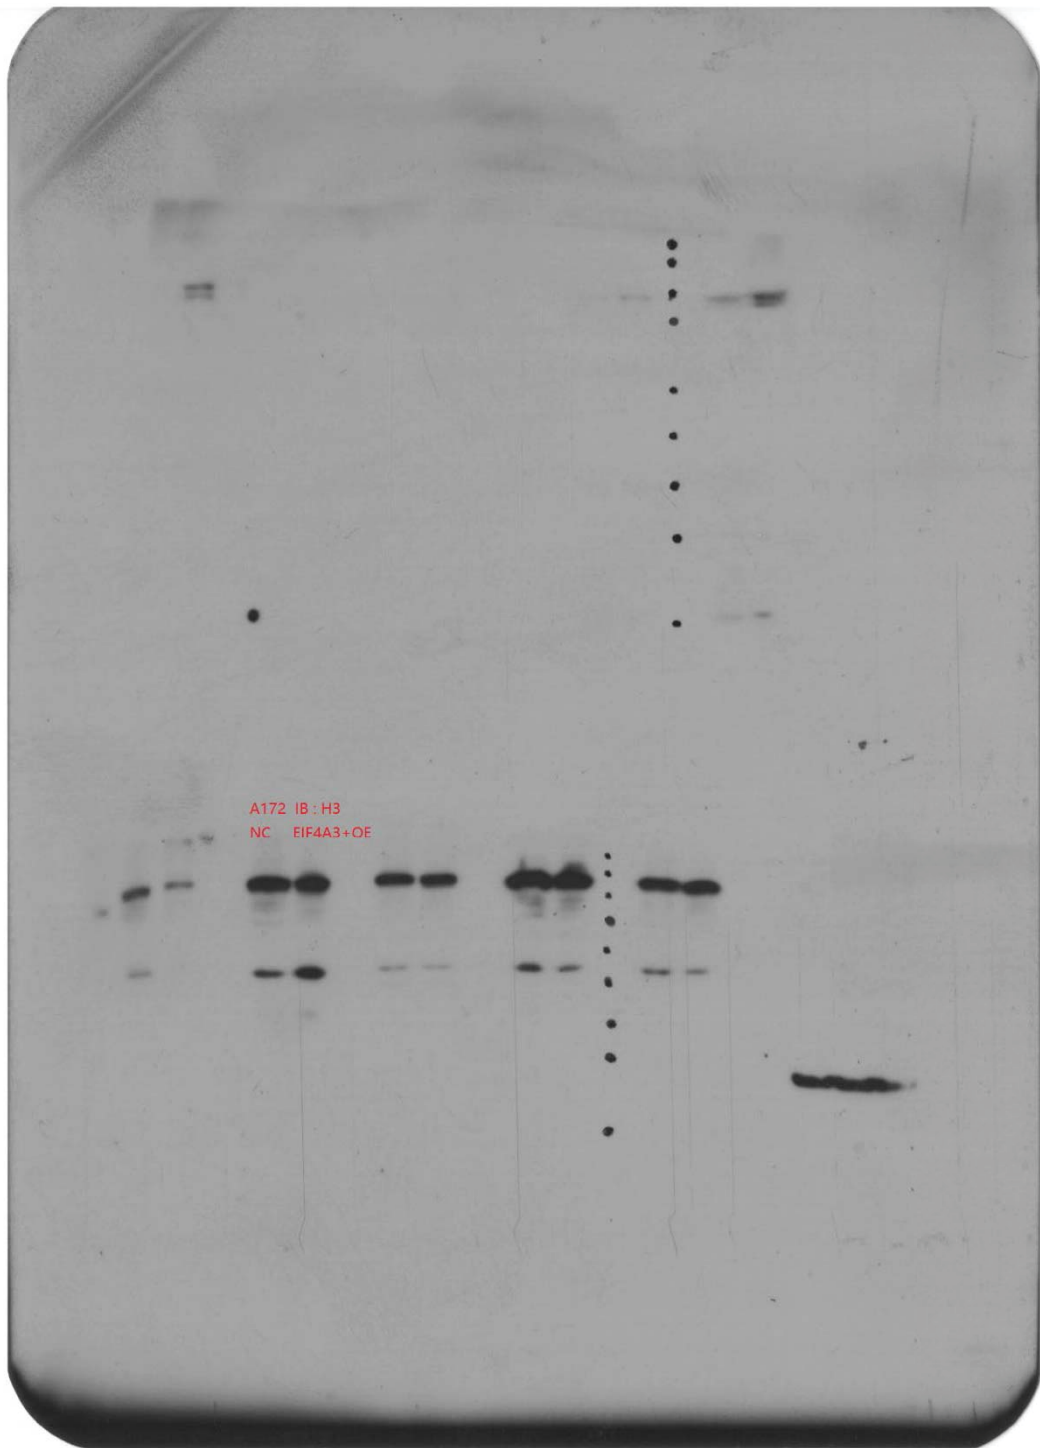

Figure 4a-U251-H3

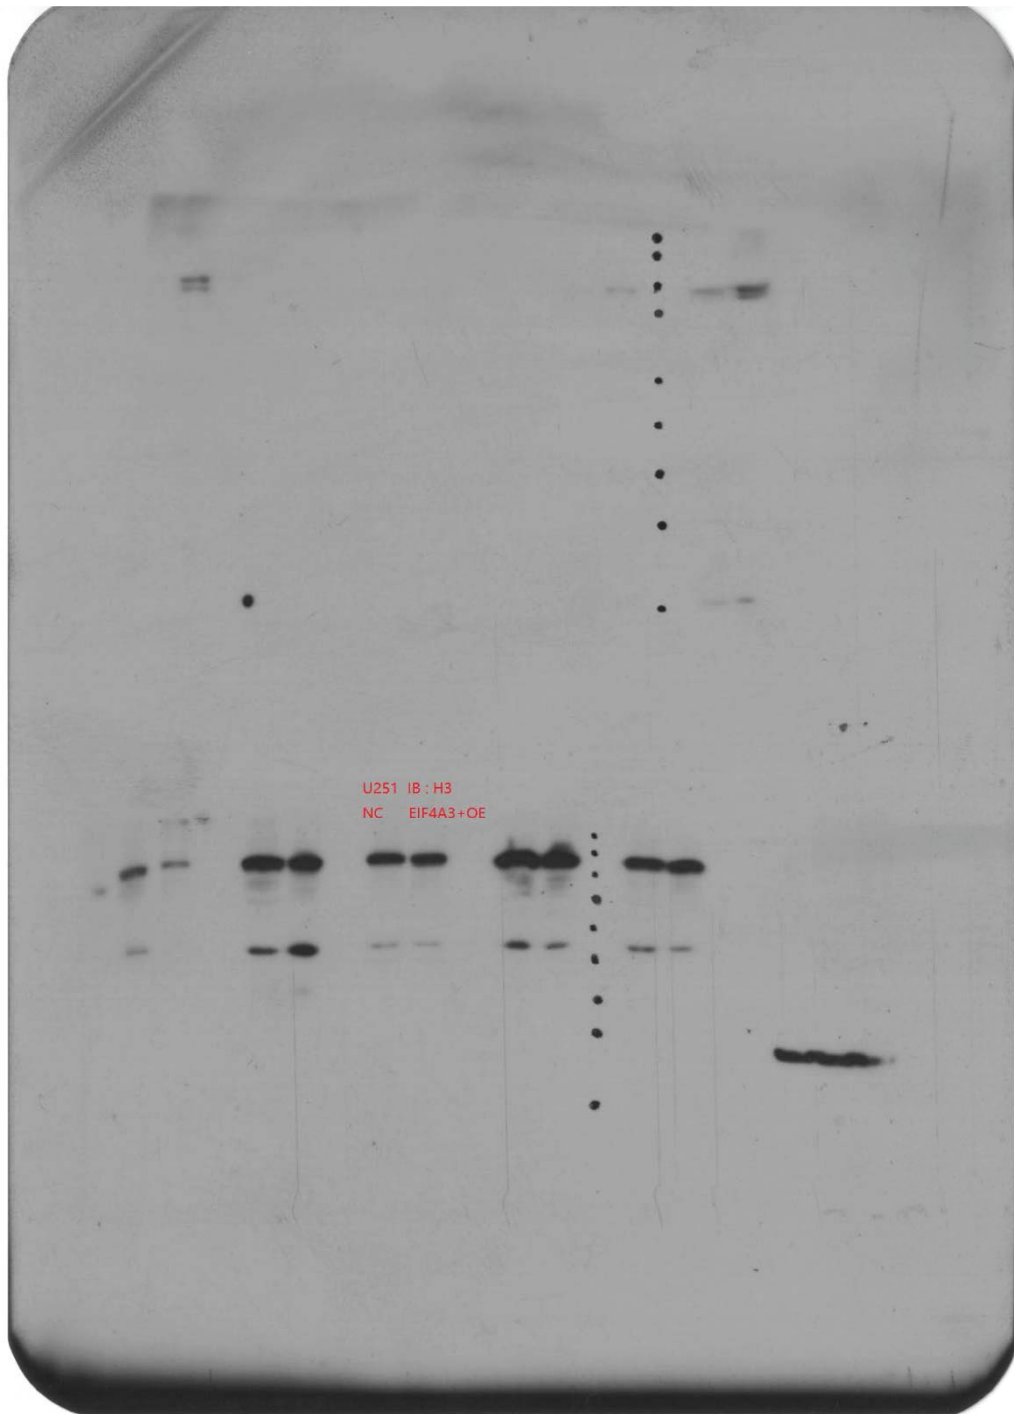

Figure 4a-U87-H3

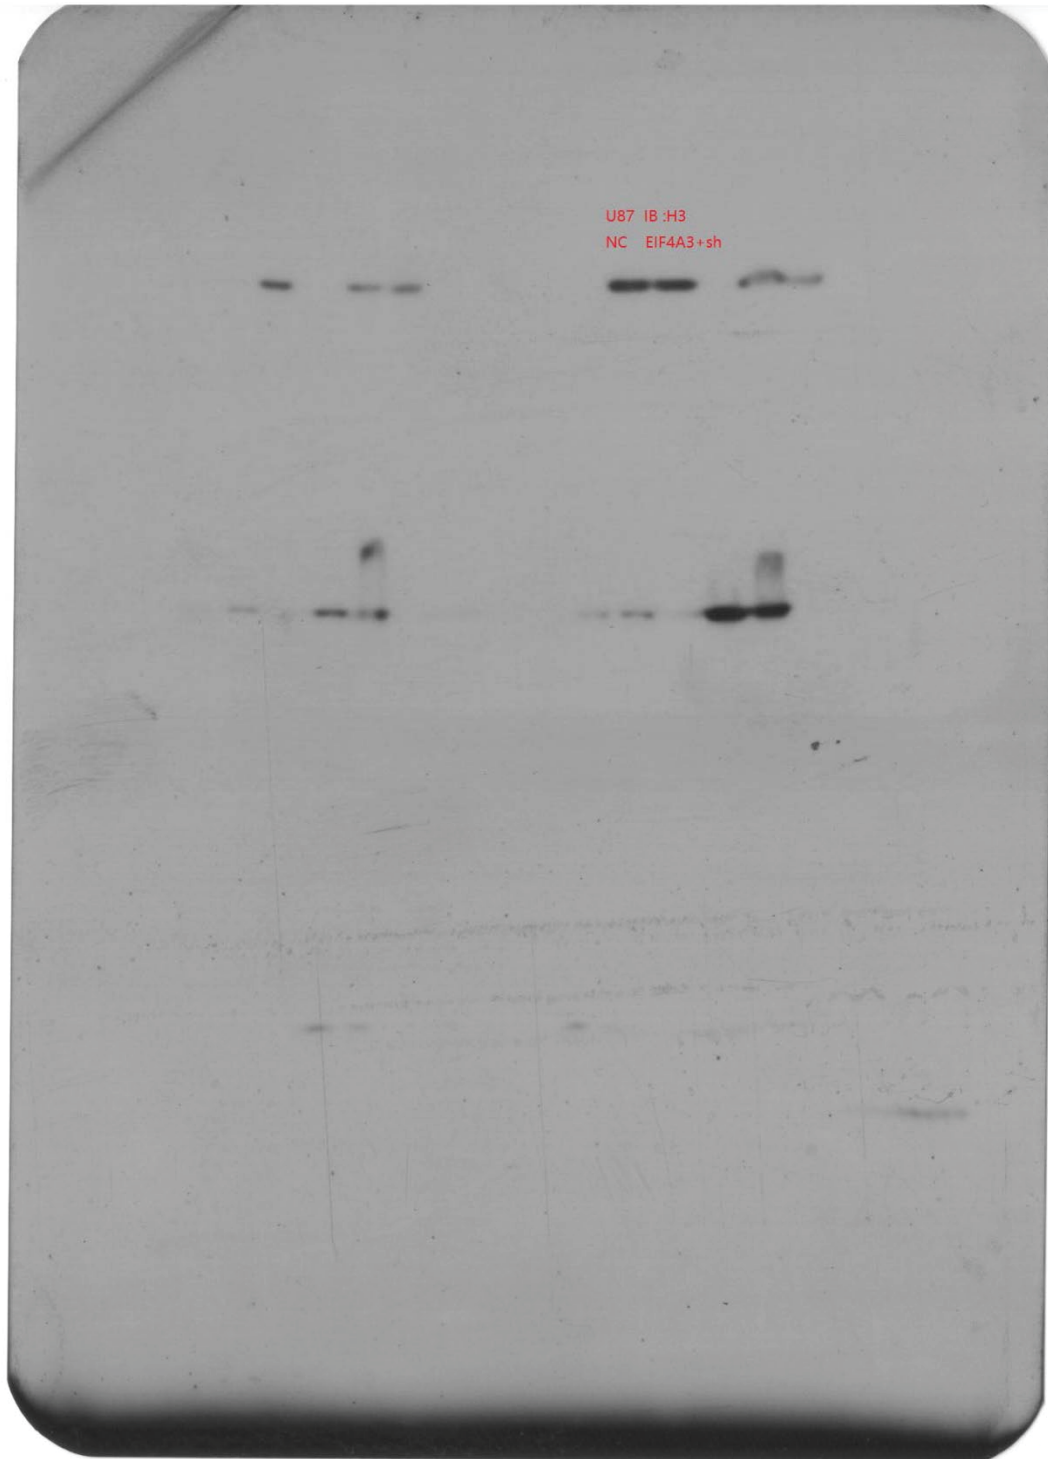

Figure 4a-T98G-H3

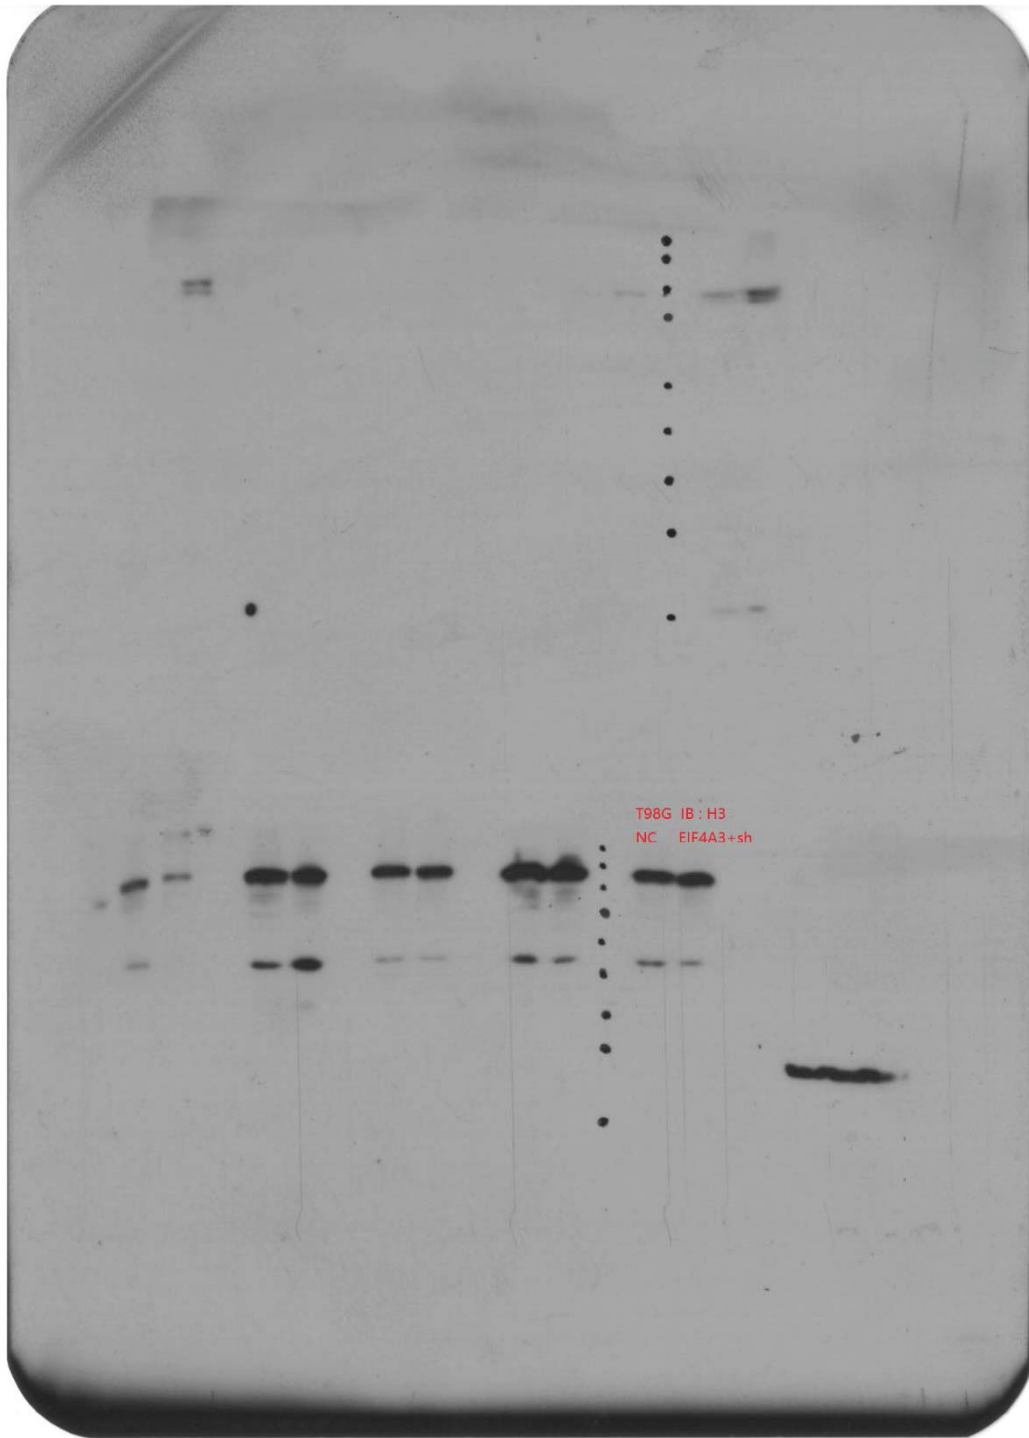

Figure 4a-A172-hes1

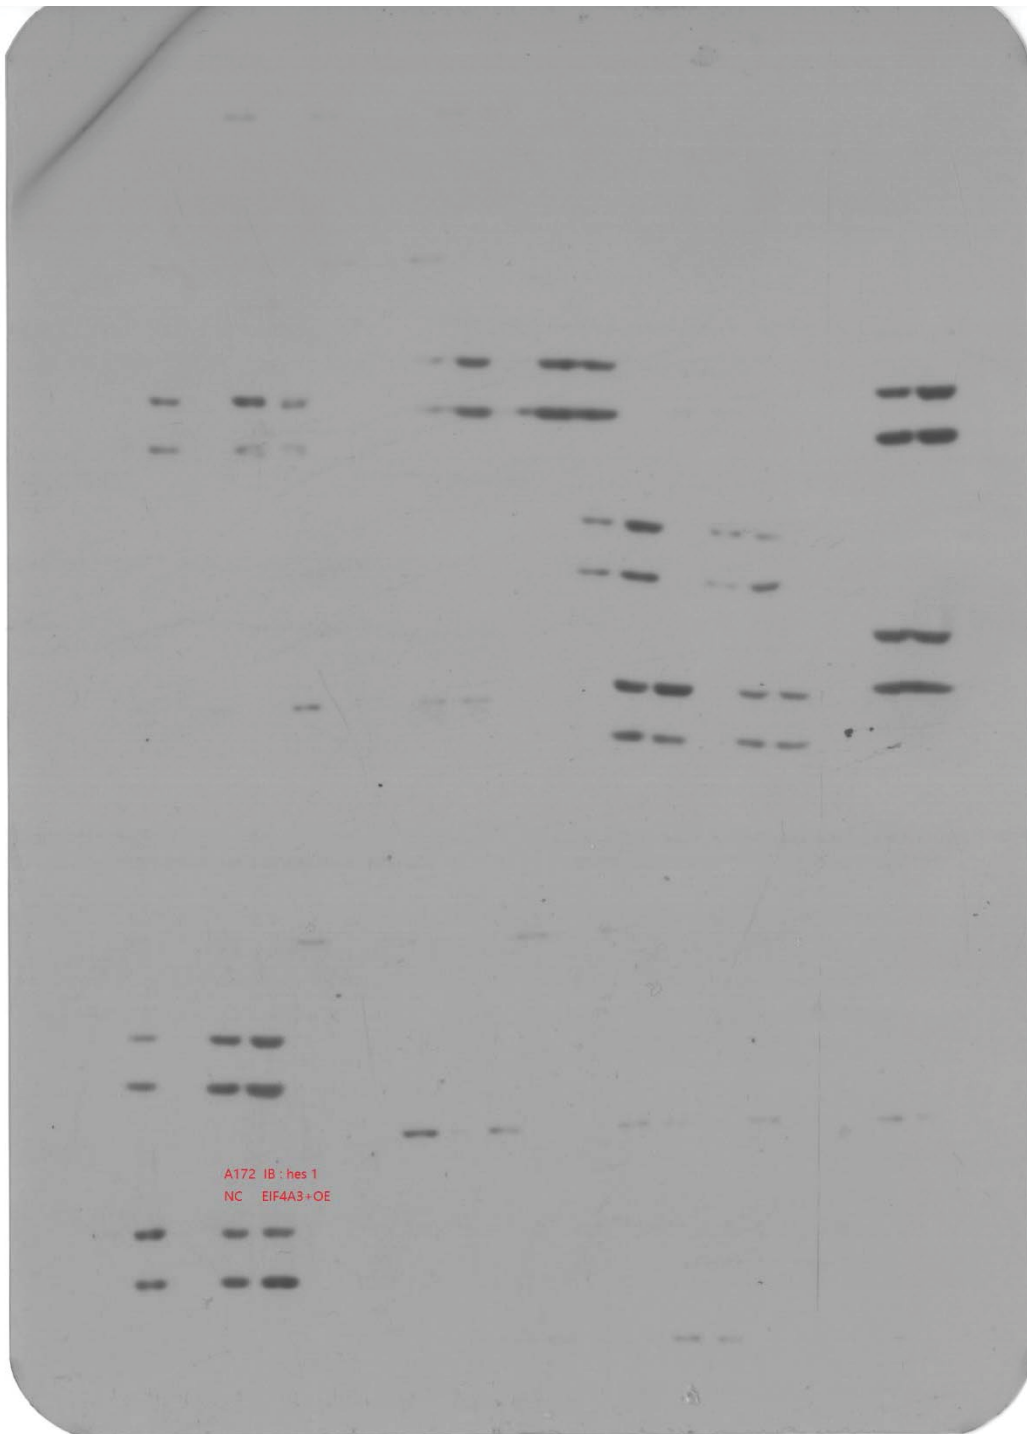



Figure 4a-U251-hes1

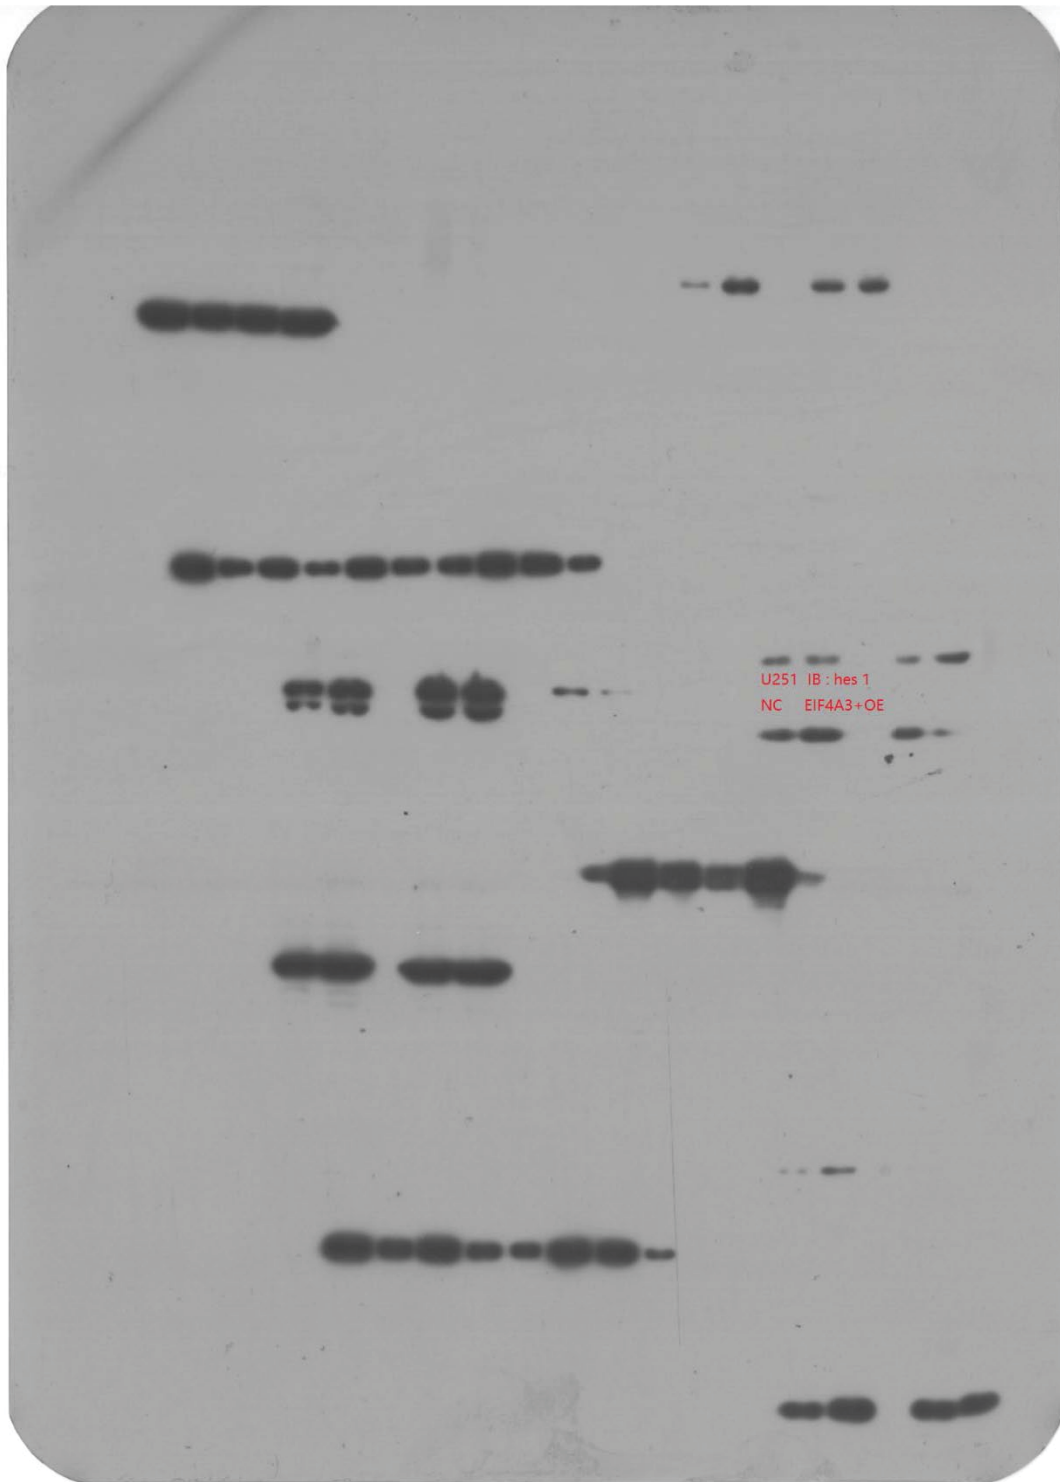

Figure 4a-U87-hes1

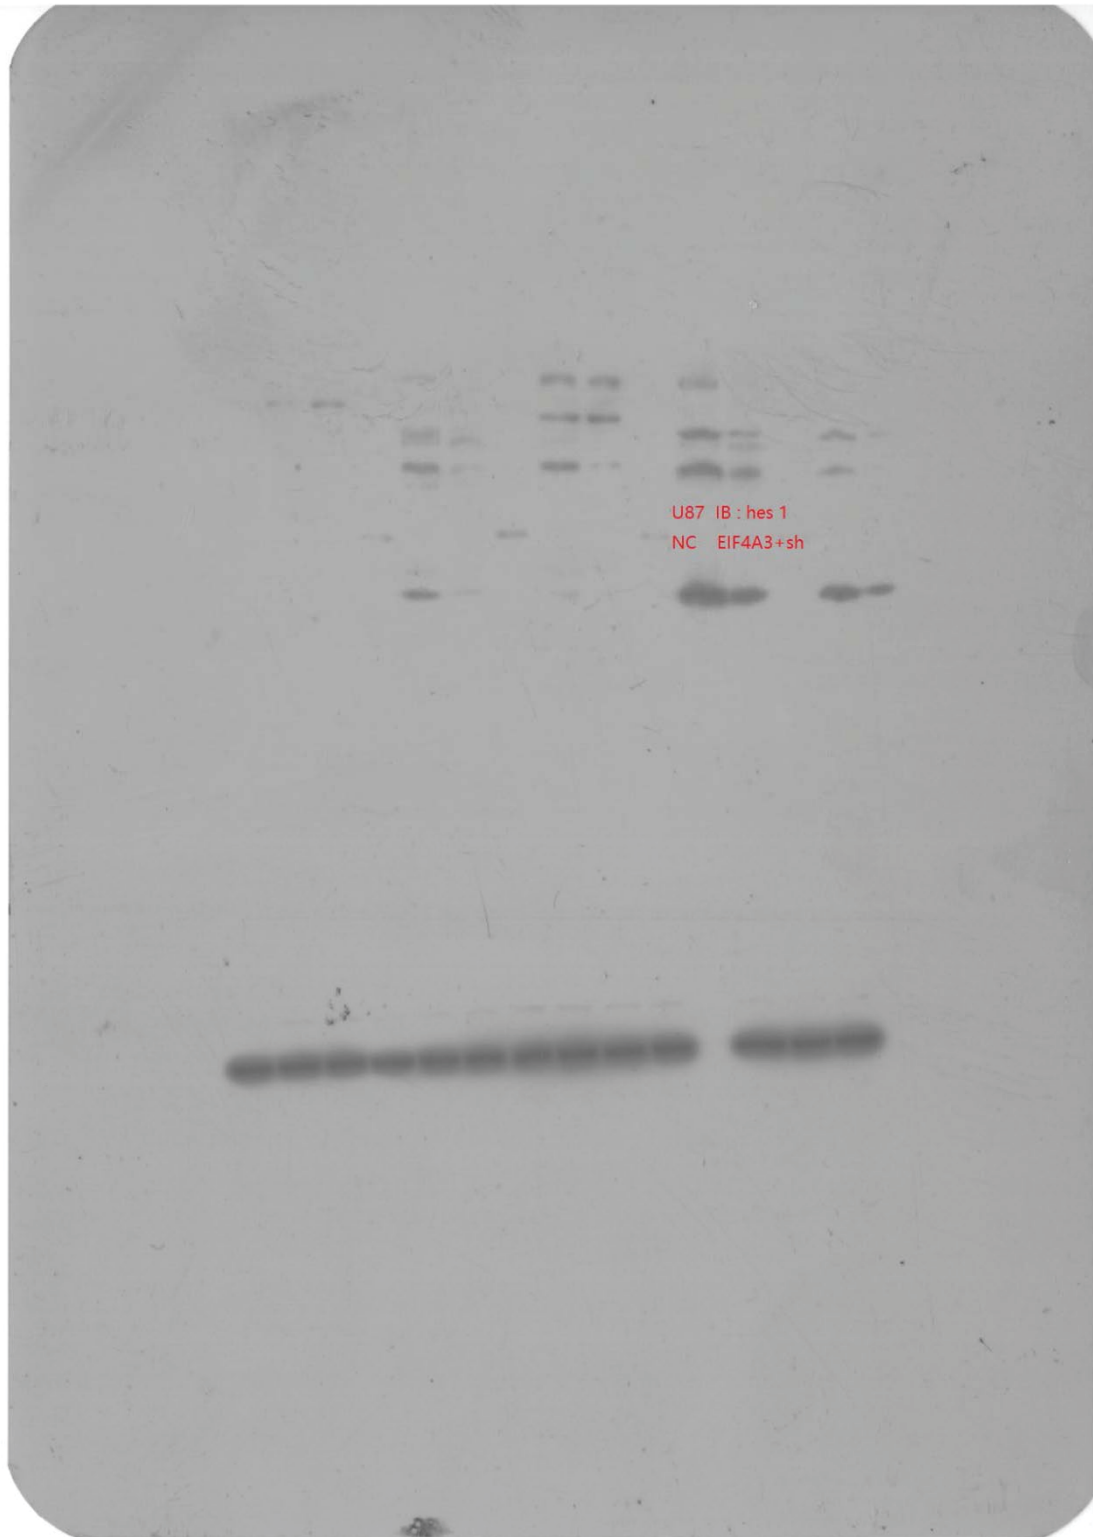

Figure 4a-T98G-hes1

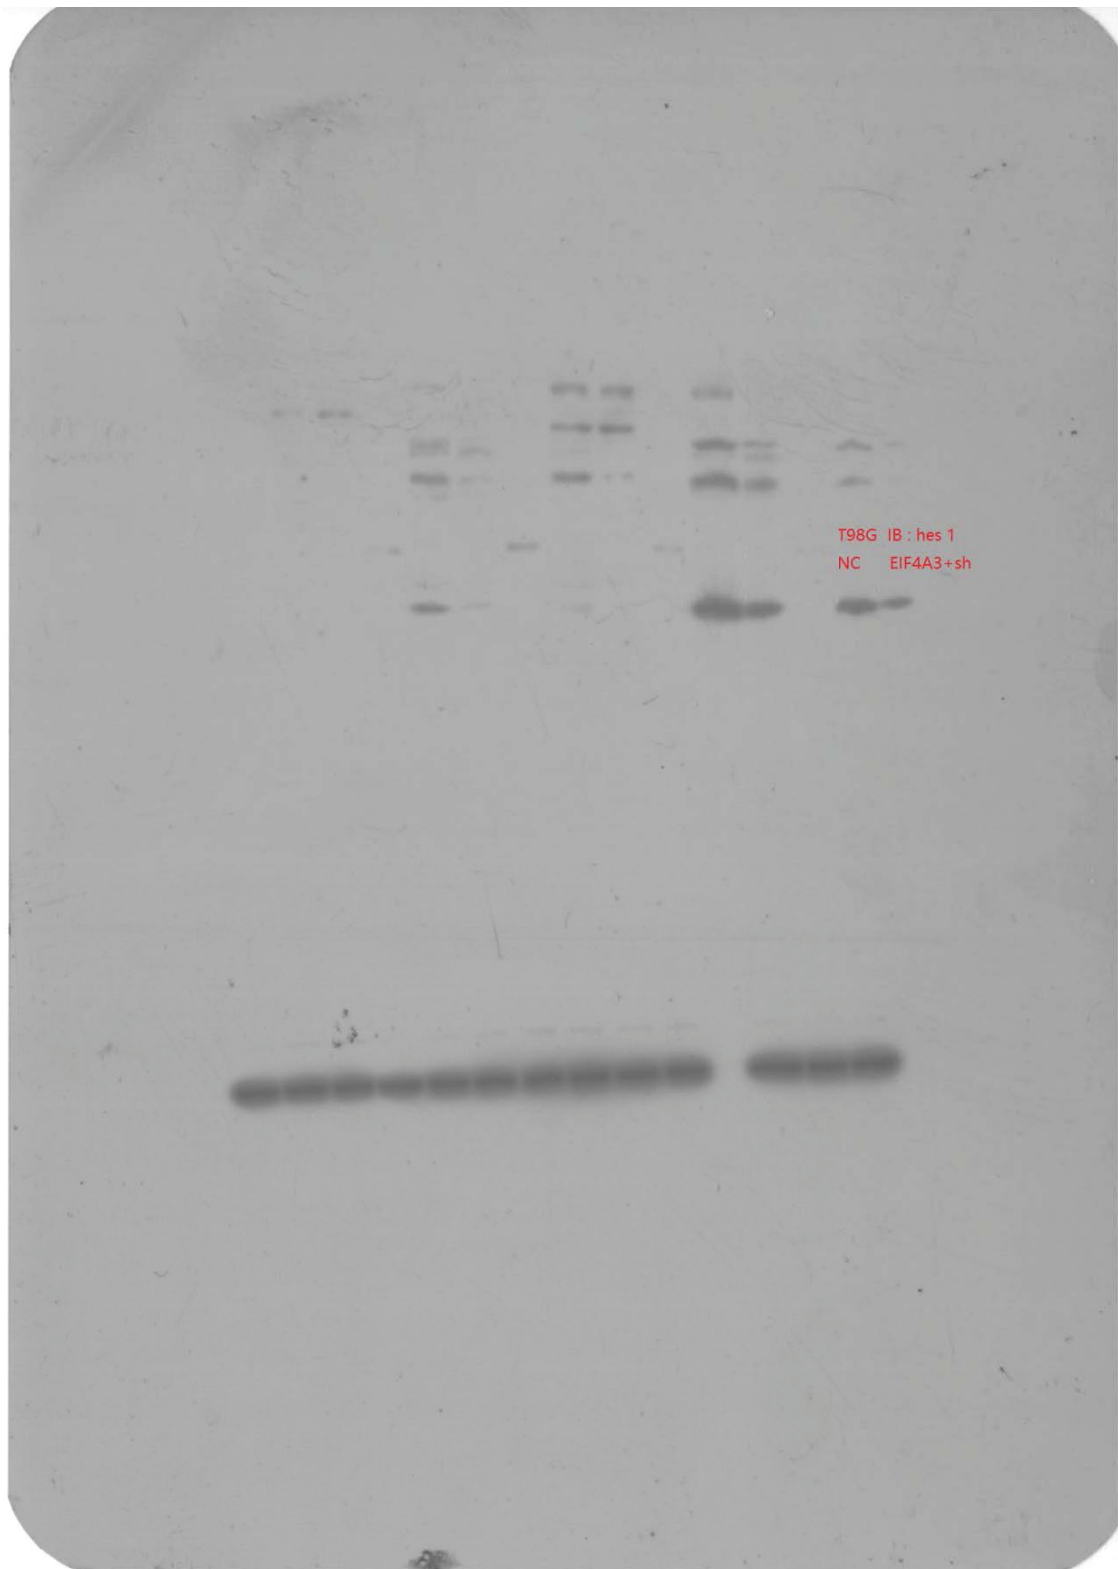

Figure 4a-A172-Notch1

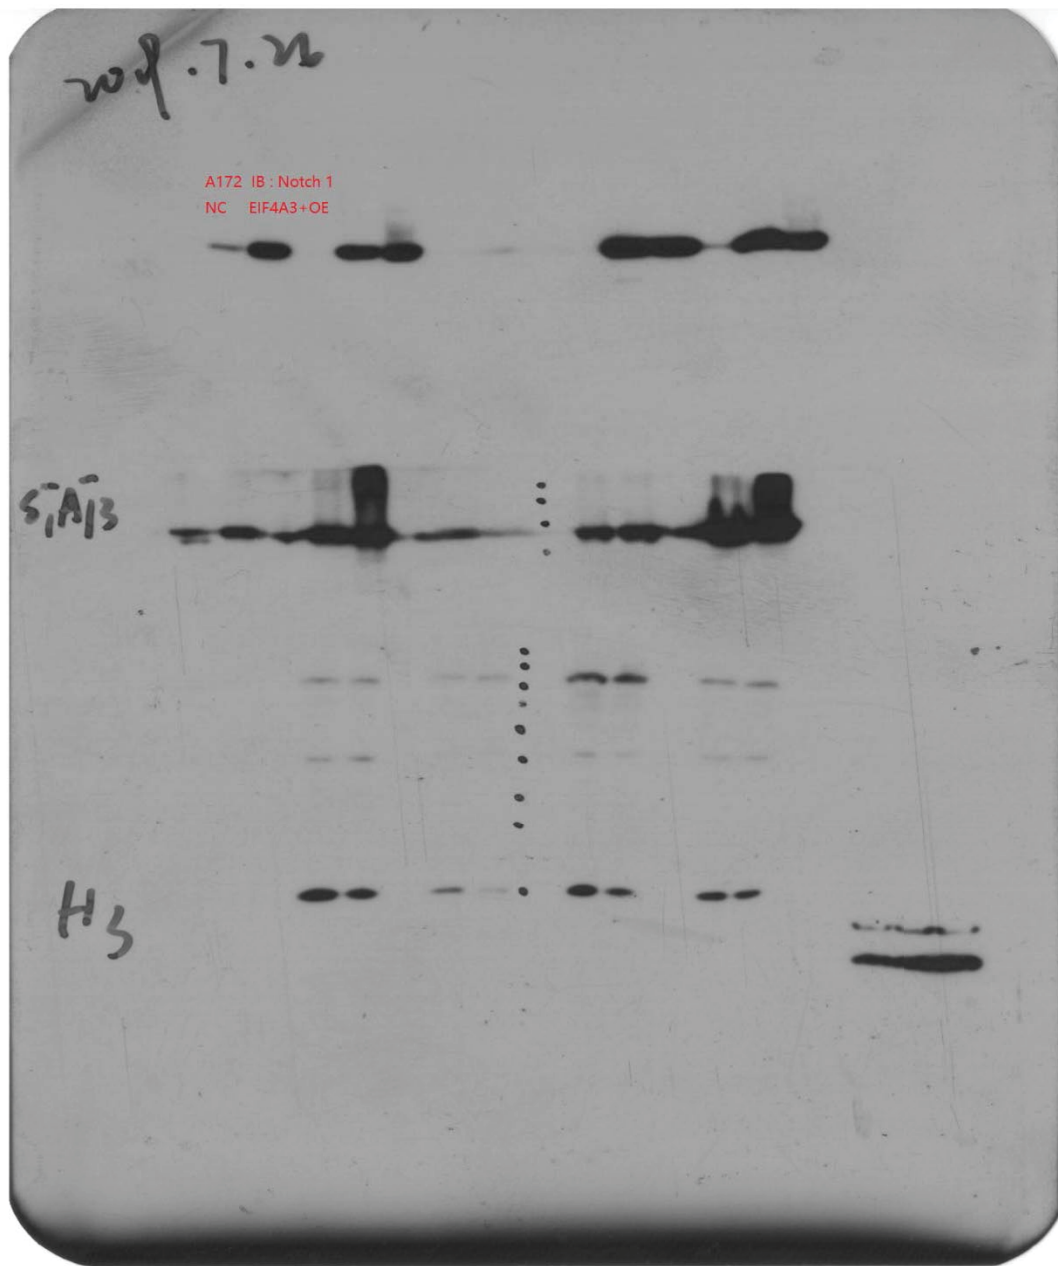

Figure 4a-U251-Notch1

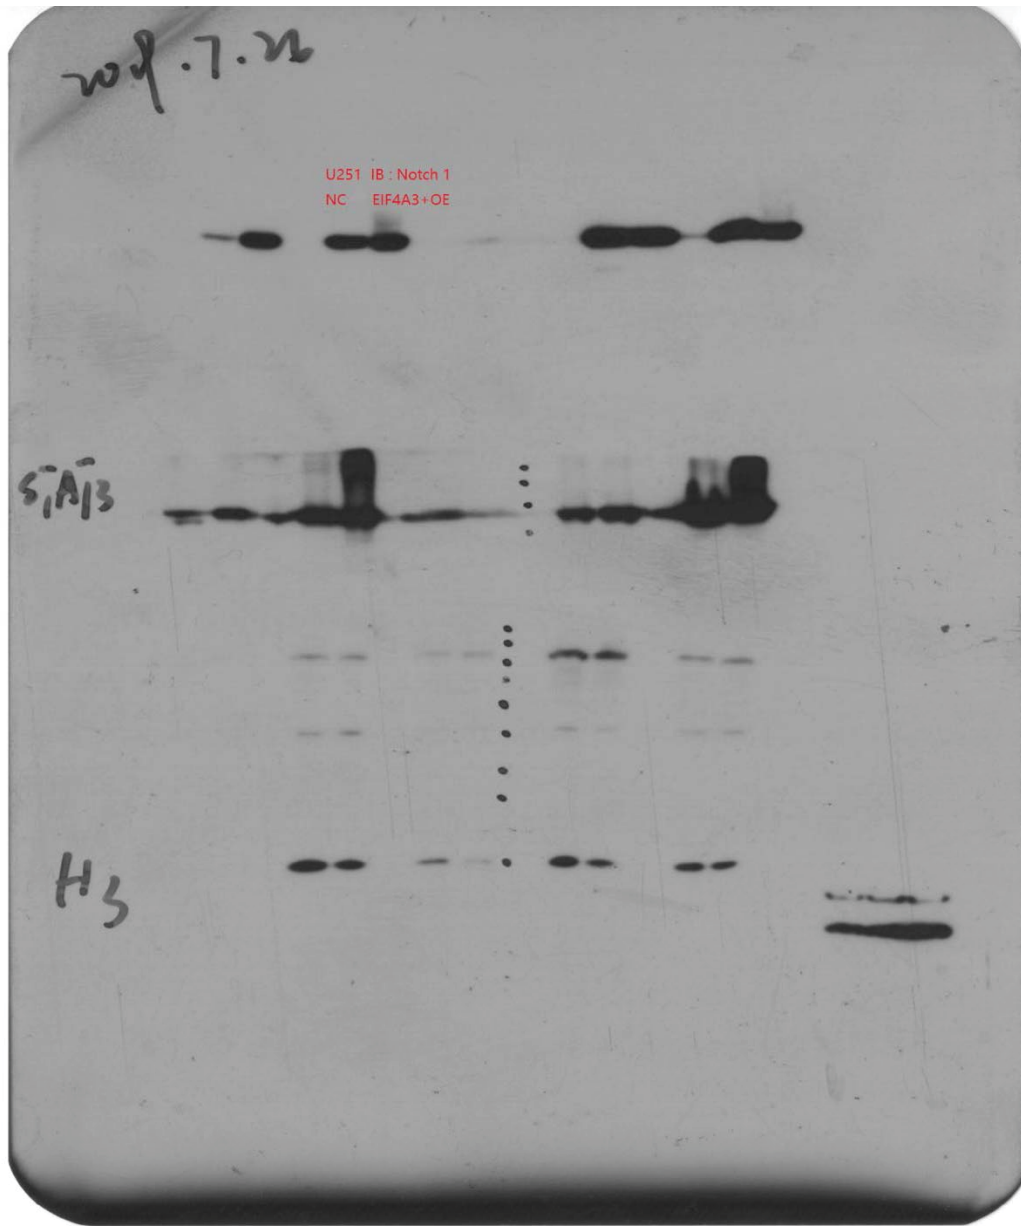

Figure 4a-U87-Notch1

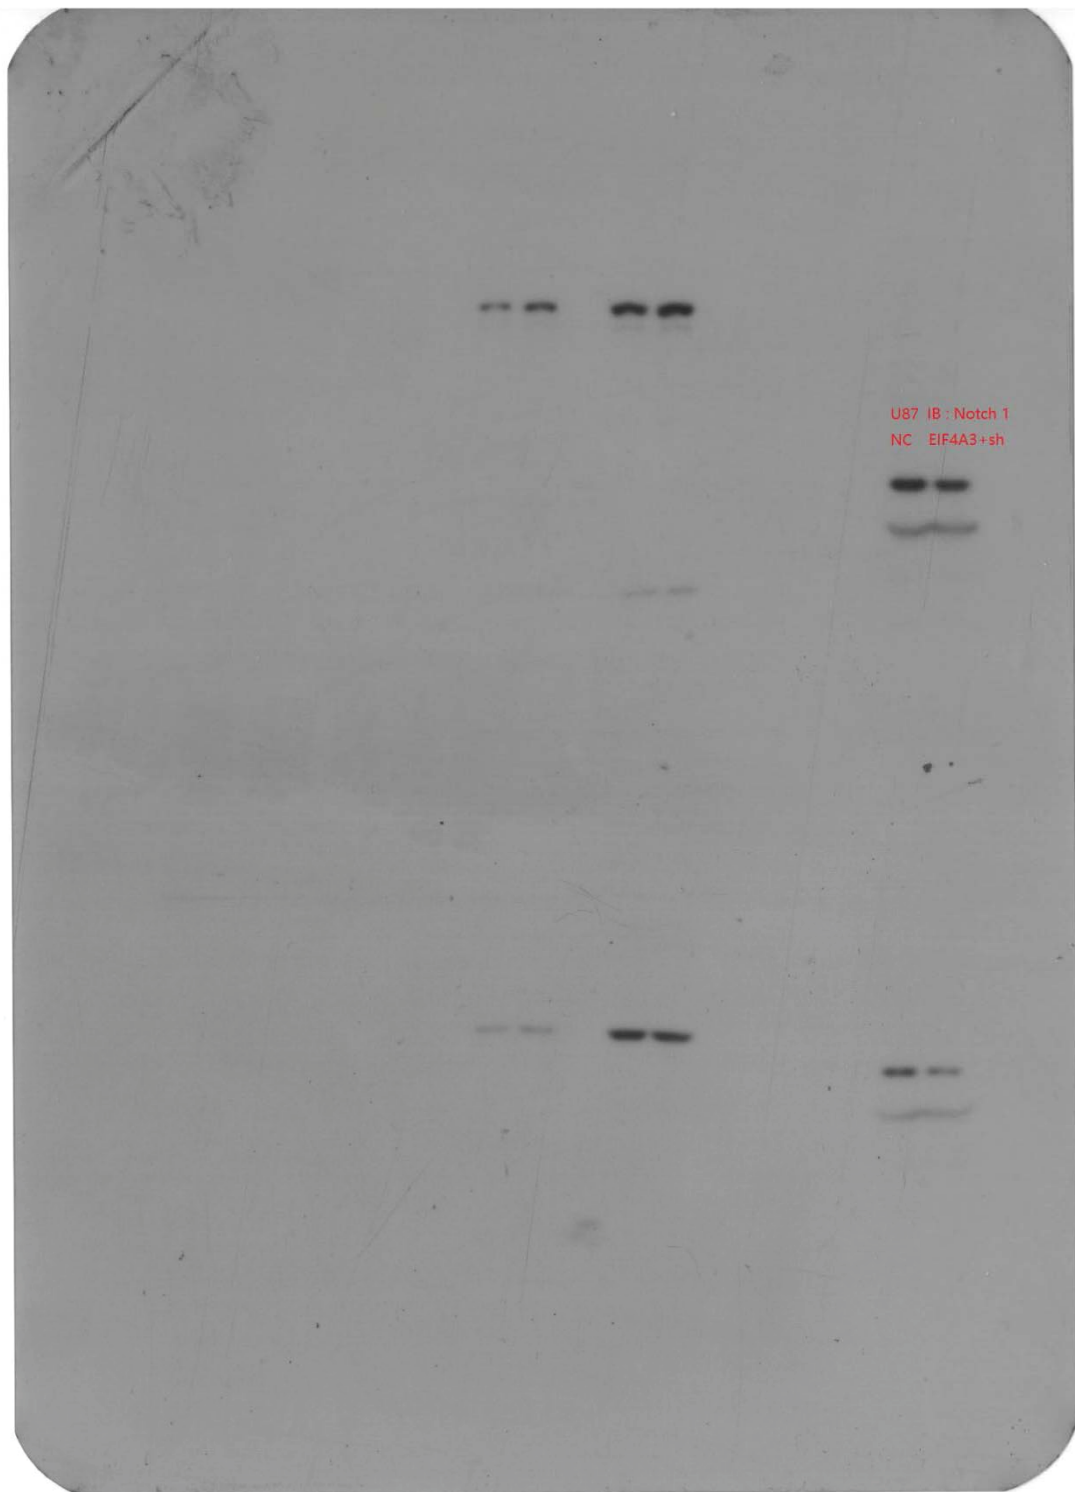

Figure 4a-T98G-Notch1

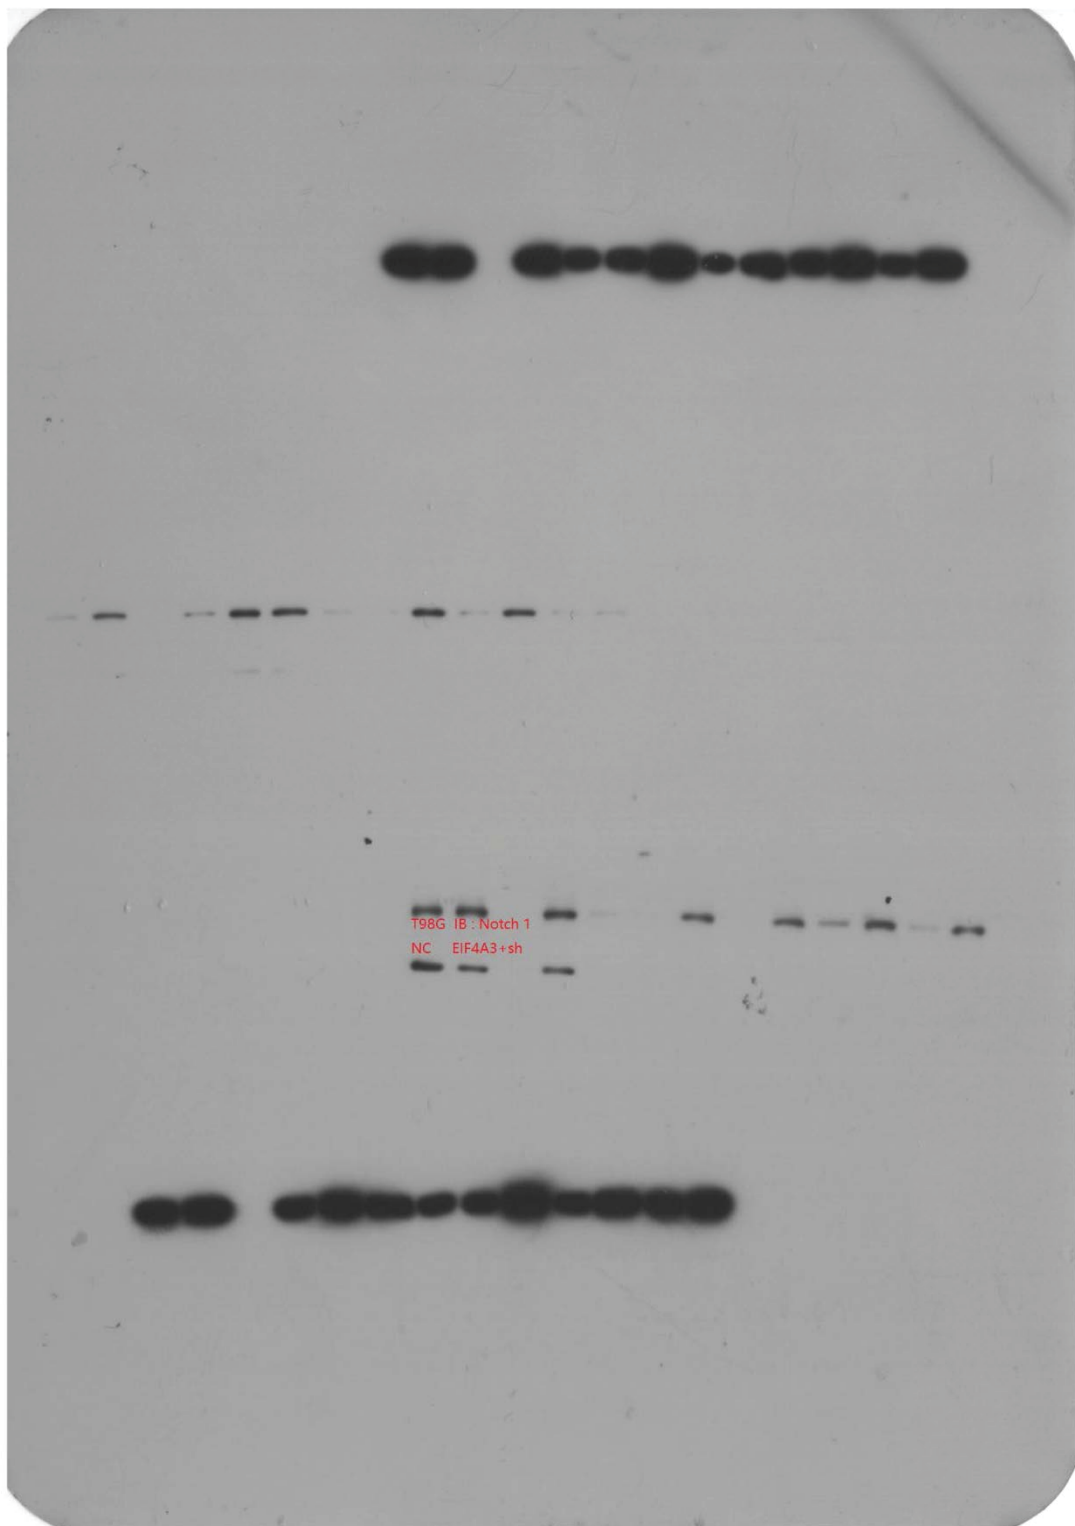

Figure 4a-A172-actin

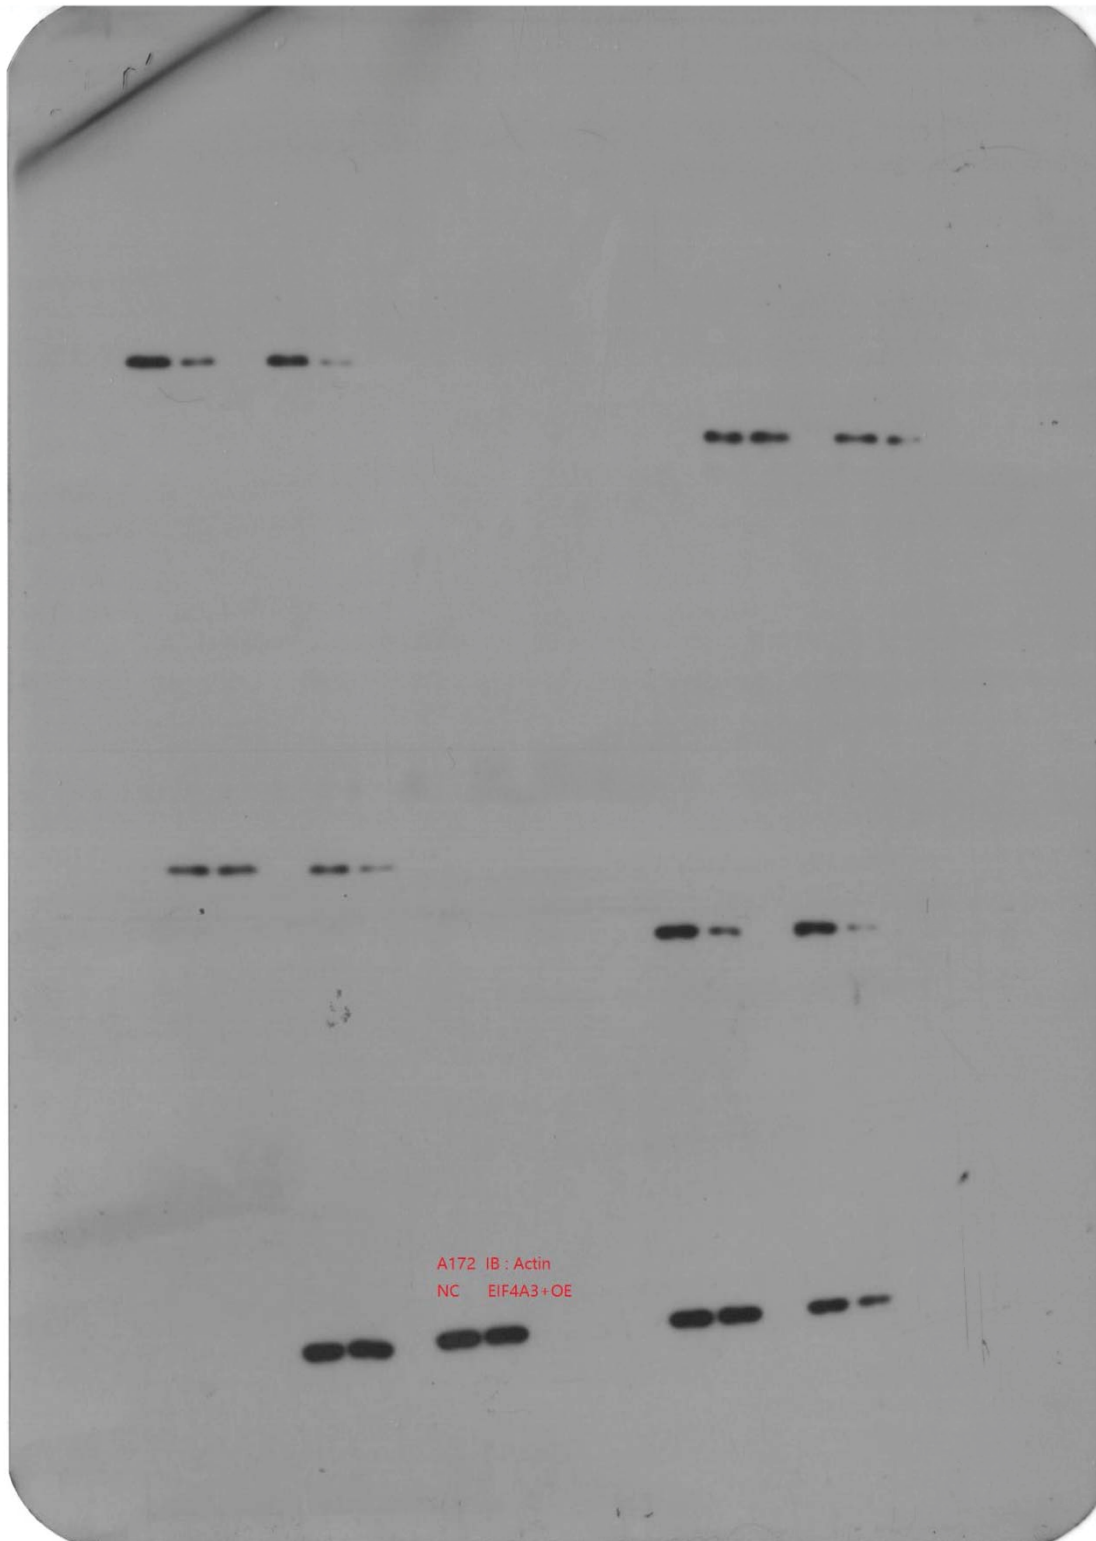



Figure 4a-U251-actin

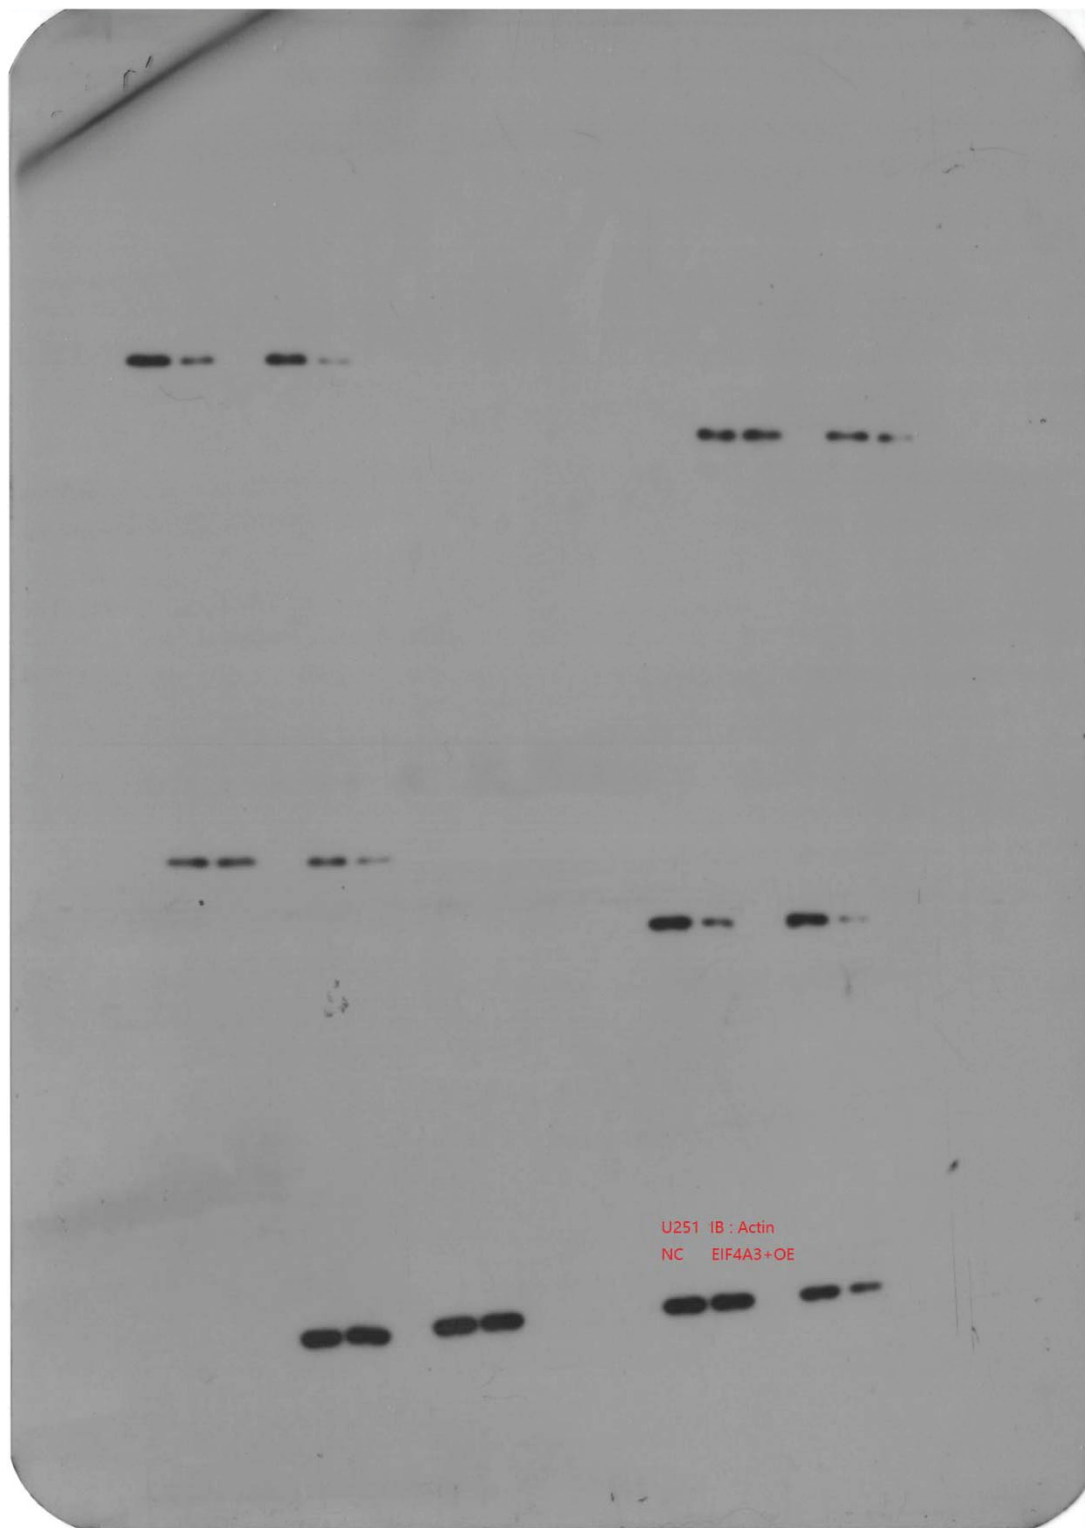

Figure 4a-U87-Actin

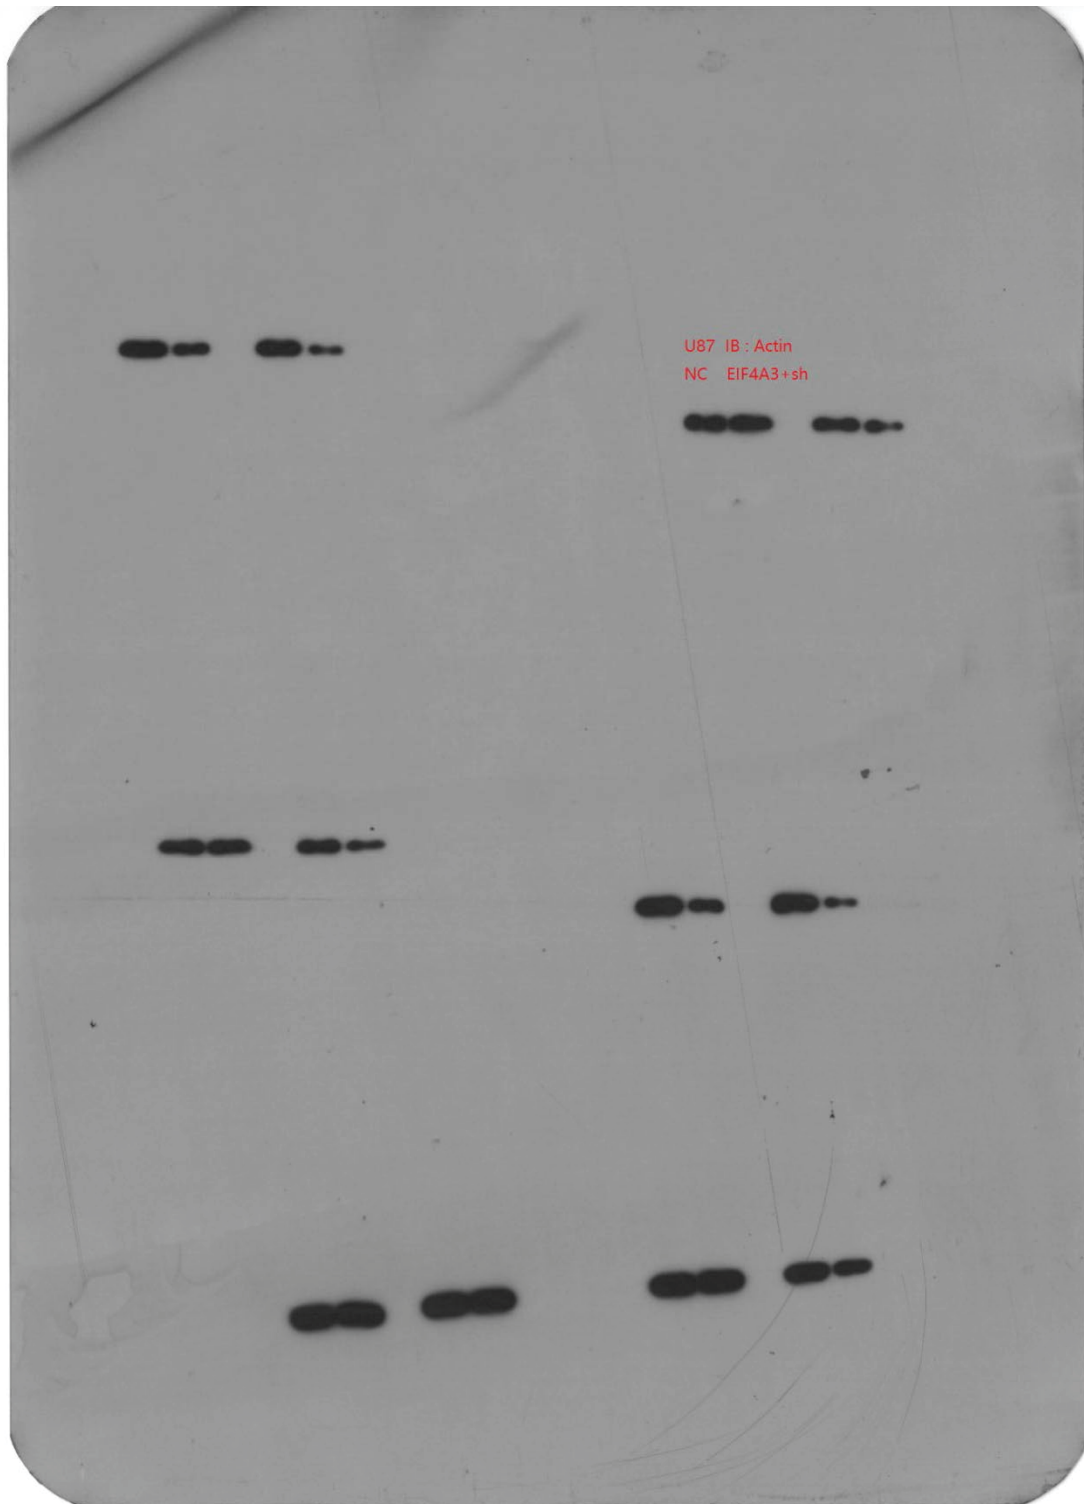

Figure 4a-T98G-Actin

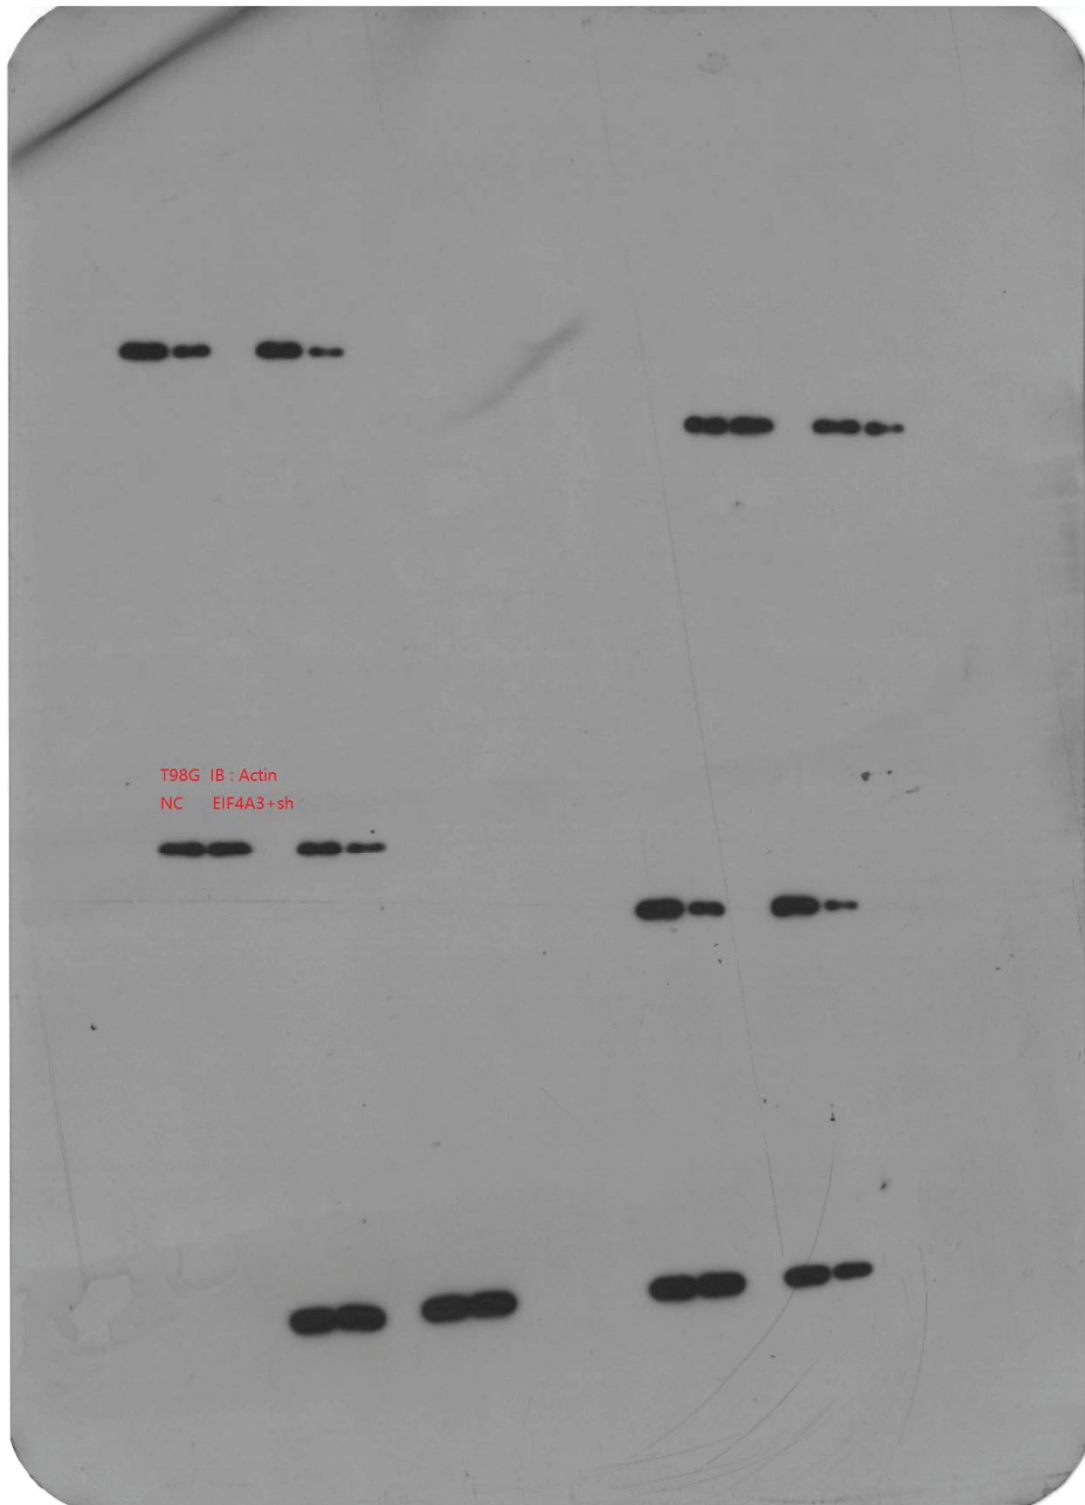

Figure S1aU251, IB: EIF4A3

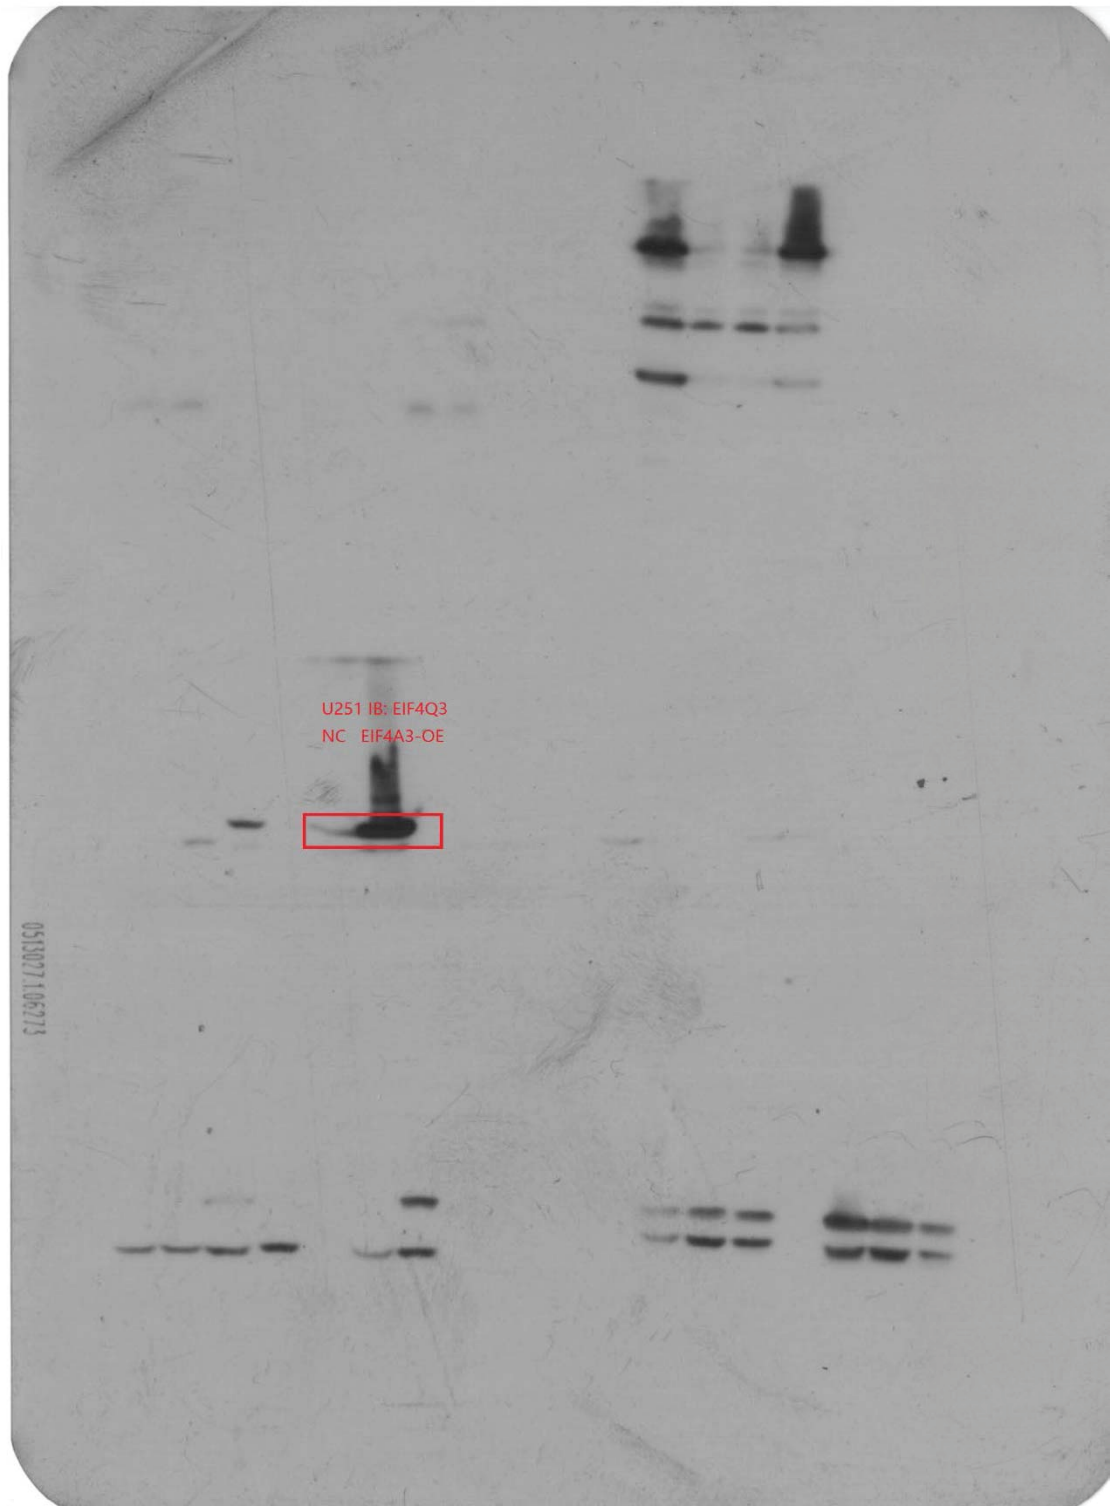

Figure S1a A172, IB: EIF4A3

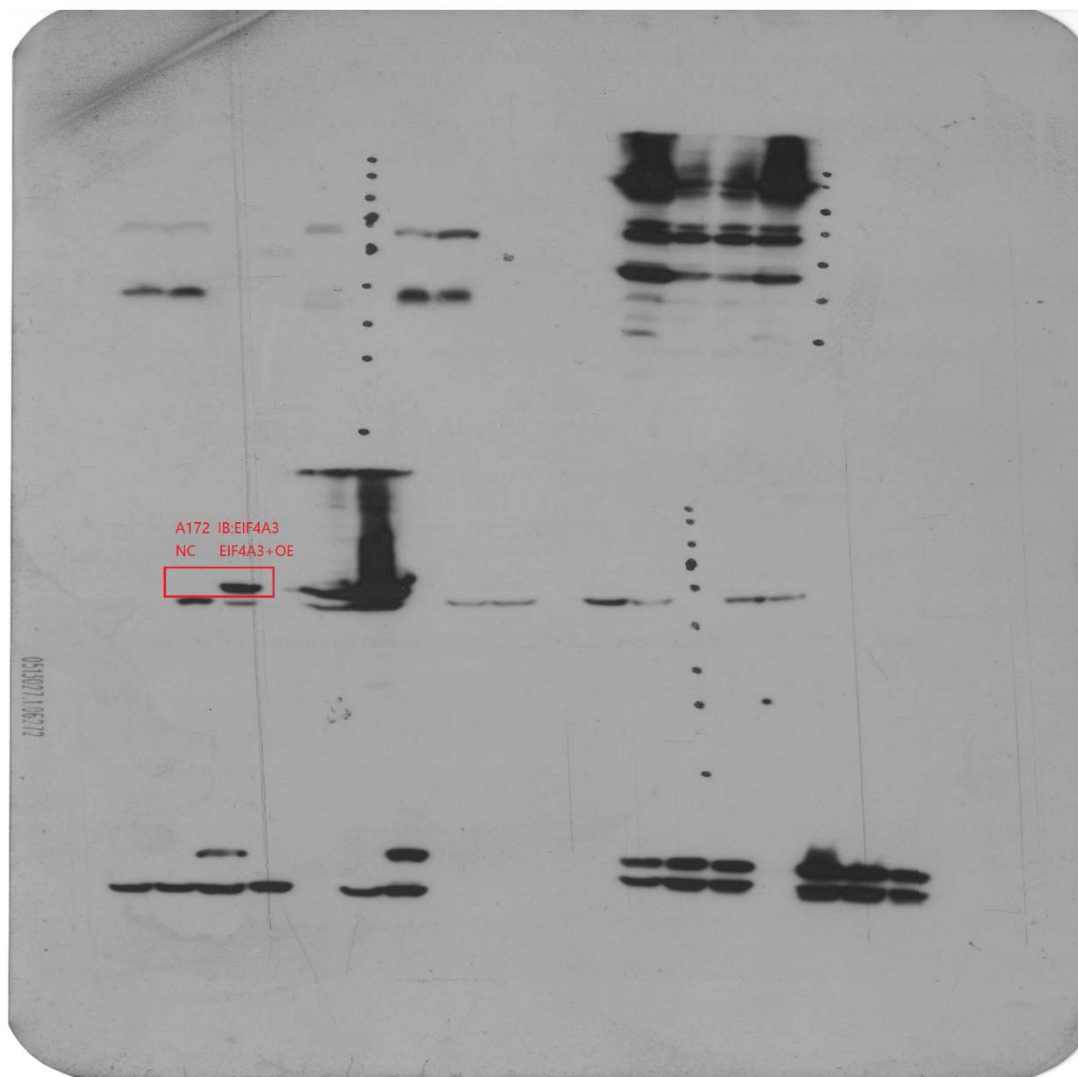

Figure S1a-A172-U251, IB: Actin

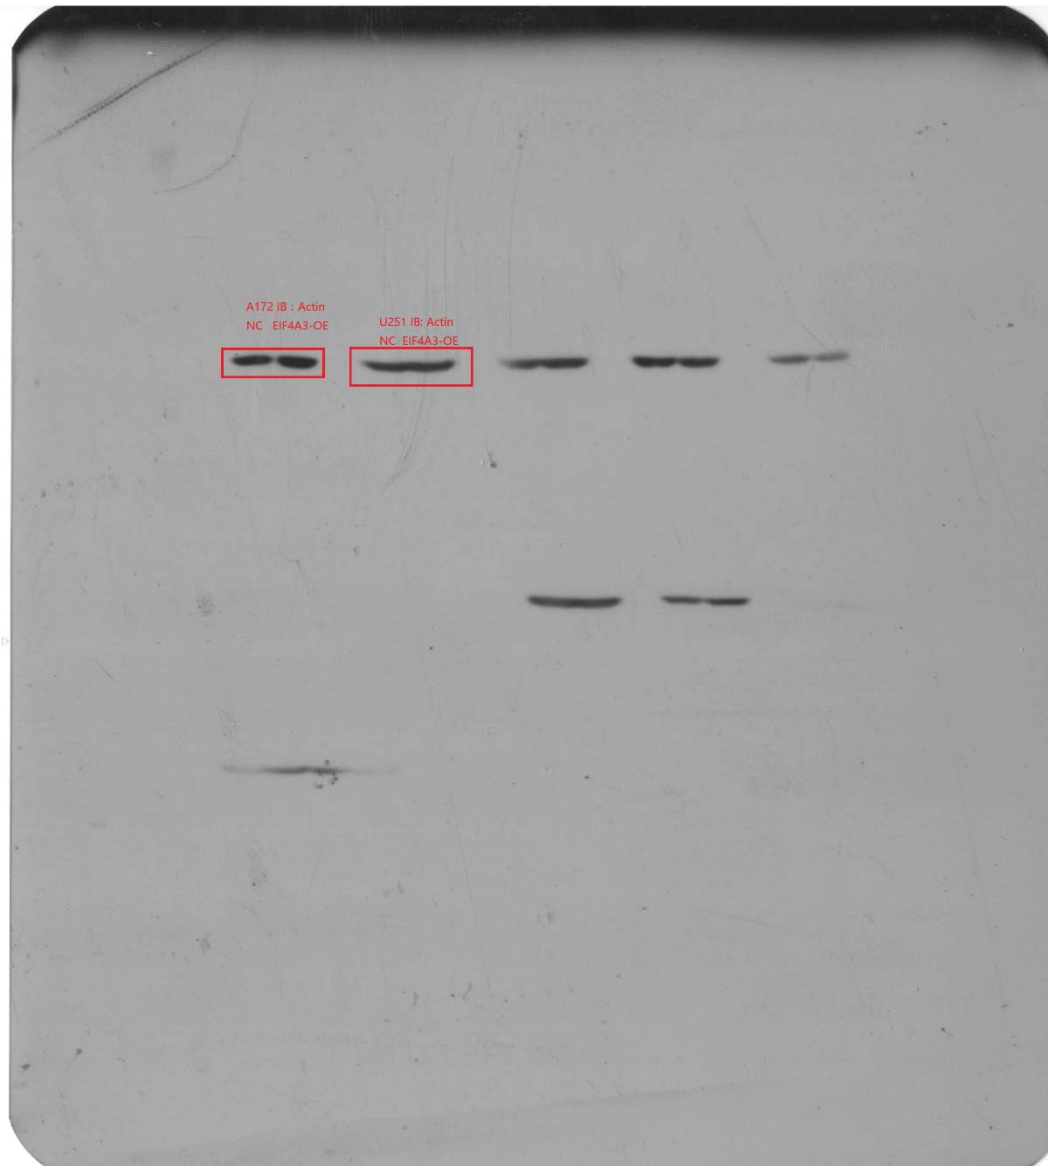

Figure 5s, IB: EIF4A3

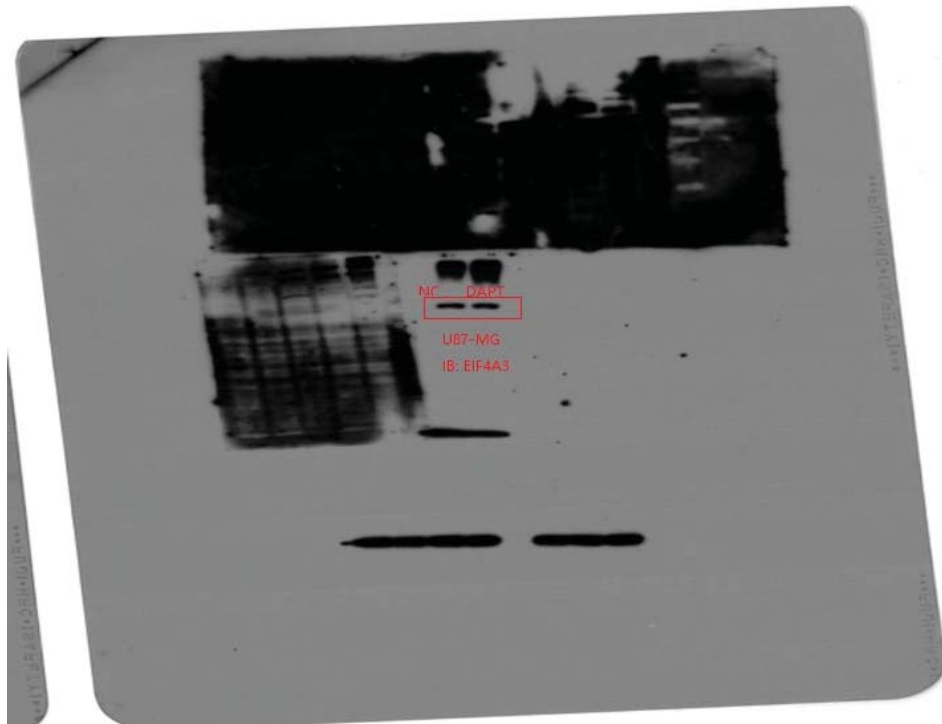

Figure 5s, IB: Actin

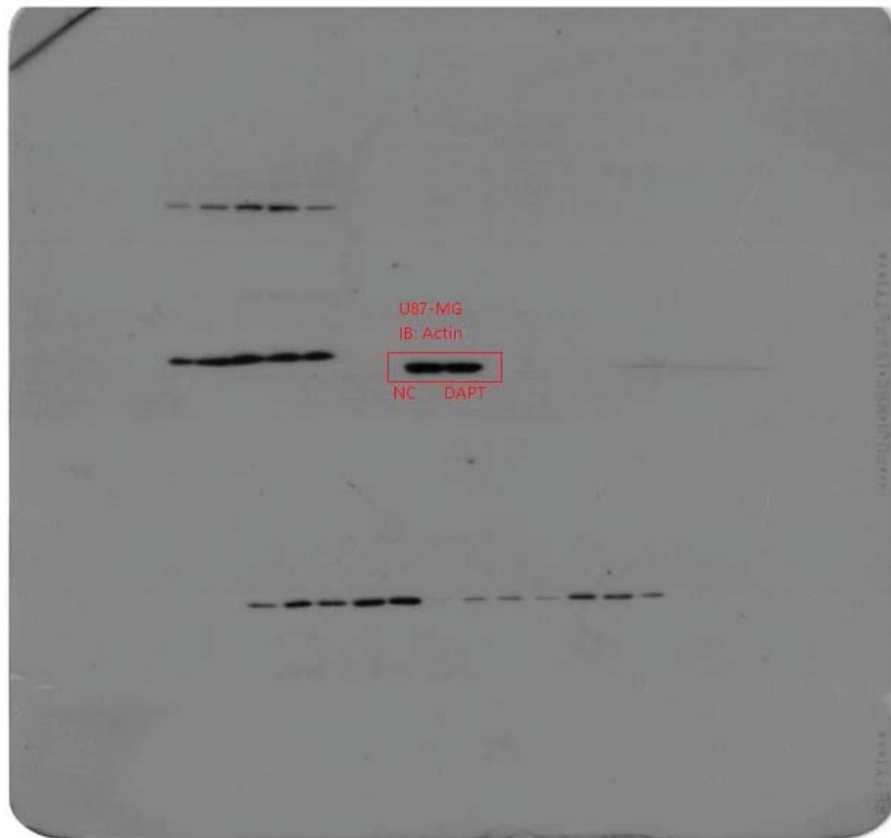

Supplement: MOESM2 [file 25490550]
